# Supplementary material
Source: bioRxiv or medRxiv preprint supplement (https://www.biorxiv.org/highwire/filestream/38147/field_highwire_adjunct_files/0/086819-1.pdf)
Supplement: Supplementary file [file 086819-1.pdf]

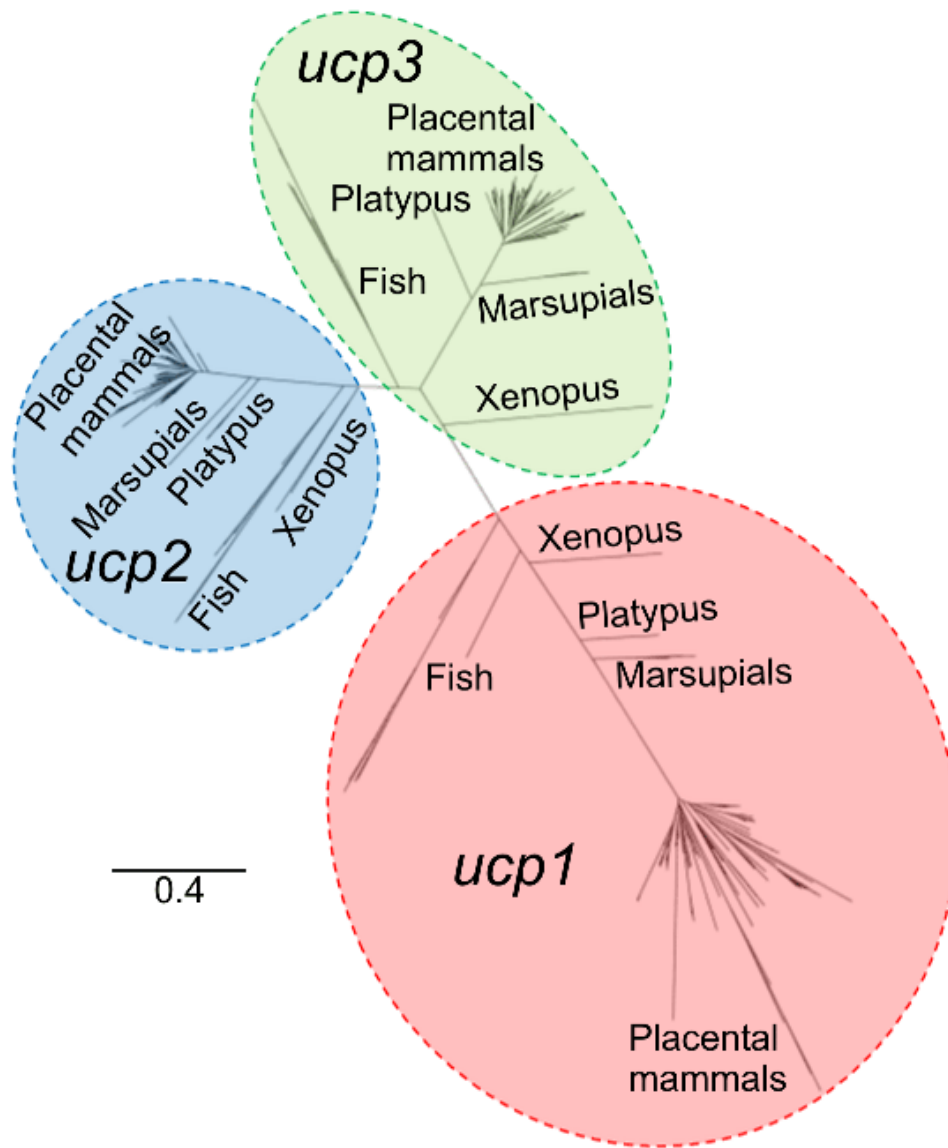

**Figure S1. Schematic maximum-likelihood tree of *ucp* sequences used in this study (N=400). Branch lengths denote number of substitutions per site.**

Exon 1

|                                   |                                                    |     |     |     |     |     |
|-----------------------------------|----------------------------------------------------|-----|-----|-----|-----|-----|
|                                   | 1                                                  | 10  | 20  | 30  | 40  | 50  |
|                                   | ...                                                | ... | ... | ... | ... | ... |
| <i>Homo sapiens</i>               | ATGGGGGGCCTGA-CAGCCTCGGACGTACACCCGACCC--TGGGGGTCC  |     |     |     |     |     |
| <i>Bradypus variegatus</i>        | ????????????????????????????????????????????????   |     |     |     |     |     |
| <i>Choloepus hoffmanni</i>        | ????????????????????????????????????????????????   |     |     |     |     |     |
| <i>Mylonodon darwini</i>          | ????????????????????????????????????????????????   |     |     |     |     |     |
| <i>Cyclopes didactylus</i>        | ????????????????????????????????????????????????   |     |     |     |     |     |
| <i>Dasypus novemcinctus</i>       | ATGGGGCGCCAGGCCTCCCGCGGGCTCACCCCCGC-----           |     |     |     |     |     |
| <i>Procavia capensis</i>          | CTG--AGTTAAGA-CAACCTCAGAAATGCCGCCTAC-----GCA       |     |     |     |     |     |
| <i>Elephas maximus</i>            | ACGGTAGGCCAGA-CGACCGCAGACGTGCCCGGACCATGGTGGGGGTCA  |     |     |     |     |     |
| <i>Mammuthus primigenius</i>      | ACGGTAGGCCAGA-CGACCGCAGACGTGCCCGGACCATGGTGGGGGTCA  |     |     |     |     |     |
| <i>Loxodonta africana</i>         | ACCGTAGGCCAGA-CGACCGCAGACGTGCCCGGACCATGGTGGGGGTCA  |     |     |     |     |     |
| <i>Trichechus manatus</i>         | ATGGTGGGCCAGA-CTACCTGGGATGTGCCCCGACCA---TGGGCGTCA  |     |     |     |     |     |
| <i>Dugong dugon</i>               | ATGGTGGGCCAGA-CTACCTCGGATGTGCCCCGACCA---TGGGCGTCA  |     |     |     |     |     |
| <i>Hydrodamalis gigas</i>         | ATGGTGGGCCAGA-CTACCTCGGATGTGCCCCGACCA---TGGGCGTCA  |     |     |     |     |     |
| <i>Sus scrofa</i>                 | CTGTCAGGA-TGA-CAGTTCCTGAAGTGCCCCGACCA---TAGCGGTCA  |     |     |     |     |     |
| <i>Sus verrucosus</i>             | CTGTCAGGA-TGA-CAGTTCCTGAAGTGCCCTCGACCA---TAGCGGTCA |     |     |     |     |     |
| <i>Sus cebifrons</i>              | CTGTCAGGA-TGA-CAGTTCCTGAAGTGCCCTCGACCA---TAGCGGTCA |     |     |     |     |     |
| <i>Physeter macrocephalus</i>     | ATGGTGGGACTCG-CAGCCTCATACTGCCCCGACCA---TGGGCGTCA   |     |     |     |     |     |
| <i>Delphinapterus leucas</i>      | -----                                              |     |     |     |     |     |
| <i>Lipotes vexillifer</i>         | ATGGTGGGACTCG-CAGCCTCAGACGTGCCCCGACCA---TGGGCGTCA  |     |     |     |     |     |
| <i>Balaena mysticetus</i>         | ATGGTGGCACTCA-CAGCCTCAGACGTGCCCCGACCA---TGGGCGTCA  |     |     |     |     |     |
| <i>Balaenoptera acutorostrata</i> | ATGCTGGGACTCA-CAGCCTCAGACGCGCCCCGACCG---TGGGCGTCA  |     |     |     |     |     |
| <i>Balaenoptera physalus</i>      | ATGCTGGGACTCA-CAGCCTCAGACGCGCCCCGACCA---TGGGCGTCA  |     |     |     |     |     |
| <i>Balaenoptera bonaerensis</i>   | ATGCTGGGACTCA-CAGCCTCAGACGCGCCCCGACCA---TGGGCGTCA  |     |     |     |     |     |
| <i>Equus asinus</i>               | ATGGTGGGGCCCA-CAGCCTCGGACCCGCCCCGACCA---TGGGCGTCA  |     |     |     |     |     |
| <i>Equus quagga boehmi</i>        | ATGGTGGGGCCCA-CAGCCTCGGACCGCCCCGACCA---TGGGCGTCA   |     |     |     |     |     |
| <i>Equus przewalskii</i>          | ????????????????????????????????????????????????   |     |     |     |     |     |
| <i>Equus caballus</i>             | ATGGTGGGGCCCA-CAGCCTCGGACGTGCCCCGACCA---TGGGCGTCA  |     |     |     |     |     |
| <i>Manis pentadactyla</i>         | -----                                              |     |     |     |     |     |

|                                   |                                                   |     |     |     |     |     |
|-----------------------------------|---------------------------------------------------|-----|-----|-----|-----|-----|
|                                   | 51                                                | 60  | 70  | 80  | 90  | 100 |
|                                   | ...                                               | ... | ... | ... | ... | ... |
| <i>Homo sapiens</i>               | AGCTCTTCTCAGCTGGA--ATAGCGGCGTGCTTGGCGGACGTGATCACC |     |     |     |     |     |
| <i>Bradypus variegatus</i>        | ????????????????????????????????????????????????  |     |     |     |     |     |
| <i>Choloepus hoffmanni</i>        | ????????????????????????????????????????????????  |     |     |     |     |     |
| <i>Mylonodon darwini</i>          | ????????????????????????????????????????????????  |     |     |     |     |     |
| <i>Cyclopes didactylus</i>        | ????????????????????????????????????????????????  |     |     |     |     |     |
| <i>Dasypus novemcinctus</i>       | -----GCGGAAACGAGGCGGC-----GGCAGGTGCACCCCGC        |     |     |     |     |     |
| <i>Procavia capensis</i>          | ACCTCTTCTCAGCTGGA--GTGGCGGCCTGCTTGGCCGGTGTGATCACC |     |     |     |     |     |
| <i>Elephas maximus</i>            | AGATCTTCTCAGCGGA--GTGGCGGCCTGCTTGGCAGATGTAATTACC  |     |     |     |     |     |
| <i>Mammuthus primigenius</i>      | AGATCTTCTCAGCGGA--GTGGCGGCCTGCTTGGCAGATGTAATTACC  |     |     |     |     |     |
| <i>Loxodonta africana</i>         | AGATCTTCTCAGCGGA--GTGGCGGCCTGCTTGGCAGATGTAATTACC  |     |     |     |     |     |
| <i>Trichechus manatus</i>         | AGATCGTCTCAGCTGGA--GTGTGGCCTGTTTGGCGGATGTGATCACC  |     |     |     |     |     |
| <i>Dugong dugon</i>               | AGATTGTCTCAGCTGGA--GTGTGGCCTGTTTGGCGGATGTGATCACC  |     |     |     |     |     |
| <i>Hydrodamalis gigas</i>         | AGATTGTCTCAGCTGGA--GTGTGGCCTGTTTGGCGGATGTGATCACC  |     |     |     |     |     |
| <i>Sus scrofa</i>                 | AGATCTTCTCAGCTGGA--GCAGCGGCCTGCGTGGCAGATGTGATCACC |     |     |     |     |     |
| <i>Sus verrucosus</i>             | AGATCTTCTCAGCTGGA--GCGGCGGCCTGCGTGGCAGATGTGATCACC |     |     |     |     |     |
| <i>Sus cebifrons</i>              | AGATCTTCTCAGCTGGA--GCGGCGGCCTGCGTGGCAGATGTGATCACC |     |     |     |     |     |
| <i>Physeter macrocephalus</i>     | AGATCTTCTCGGCTGGA--GTGGCGGCCTGCGTGGCGGATGTGATCACC |     |     |     |     |     |
| <i>Delphinapterus leucas</i>      | -----                                             |     |     |     |     |     |
| <i>Lipotes vexillifer</i>         | AGATCTTCTCGGCTGGA--GTGGCGGCCAGCGTGGCGGATGTGATCACC |     |     |     |     |     |
| <i>Balaena mysticetus</i>         | CGATCTTCTCGGCTGGA--GTGGCGGCCGCGCTGGCGGATGTGATCACC |     |     |     |     |     |
| <i>Balaenoptera acutorostrata</i> | CGATCTTCTCGGCTGGA--GTGGCGGCCGCGCTGGCGGATGTGATCACC |     |     |     |     |     |
| <i>Balaenoptera physalus</i>      | CGATCTTCTCGGCTGGA--GTGGCGGCCGCGCTGGCGGATGTGATCACC |     |     |     |     |     |
| <i>Balaenoptera bonaerensis</i>   | CGATCTTCTCGGCTGGA--GTGGCGGCCGCGCTGGCGGATGTGATCACC |     |     |     |     |     |
| <i>Equus asinus</i>               | AGATCTTCTCGGCTGGA--GTGGCGGCCTGCGTGGCGGACGTGATCGCC |     |     |     |     |     |
| <i>Equus quagga boehmi</i>        | AGATCTTCTCGGCTGGA--GTGGCGGCCTGCGTGGCGGACGTGATCGCC |     |     |     |     |     |

*Equus przewalskii*  
*Equus caballus*  
*Manis pentadactyla*

?????????????????????????????????????????CCTGCGTGCGGACGTGATCGCC  
 AGATCTTCTCGGCTGGA--GTGGCGGCTGCGTGCGGACGTGATCGCC

|                                   | 101      | 110                          | 120      | 130                   |
|-----------------------------------|----------|------------------------------|----------|-----------------------|
|                                   | ...      | ...                          | ...      | ...                   |
| <i>Homo sapiens</i>               | TTCCCGC  | --TGGACACGGCCAAAGTCCGGCTCAG  | gt       |                       |
| <i>Bradypus variegatus</i>        | ???????? | ????????                     | ???????? | ????????              |
| <i>Choloepus hoffmanni</i>        | ???????? | ????????                     | ???????? | ????????              |
| <i>Mylodon darwini</i>            | ???????? | ????????                     | ???????? | ????????              |
| <i>Cyclopes didactylus</i>        | ???????? | ????????                     | ???????? | ????????              |
| <i>Dasypropus novemcinctus</i>    | CTCC     | TCCGC                        | TGGG     | GCCGCCAGCCTGGGGCTGCAG |
| <i>Procvavia capensis</i>         | TTCCAC   | --TGGACACTGCCCAAGTTCCGGTACAG | gc       |                       |
| <i>Elephas maximus</i>            | TTCCCGC  | --TGATCGCGGCCAAAGTTCCGGTGCAG | at       |                       |
| <i>Mammuthus primigenius</i>      | TTCCCGC  | --TGGTCGCGGCCAAAGTTCCGGTGCAG | at       |                       |
| <i>Loxodonta africana</i>         | TTCCCGC  | --TGGTCGCGGCCAAAGTTCCGGTGCAG | at       |                       |
| <i>Trichechus manatus</i>         | TTCCAC   | --TGGACACGGCCAAGTTCCGGTACAG  | gt       |                       |
| <i>Dugong dugon</i>               | TTCCAC   | --TGGACACGGCCAAGTTCCGGTACAG  | gt       |                       |
| <i>Hydrodamalis gigas</i>         | TTCCAC   | --TGGACACGGCCAAGTTCCGGTACAG  | gt       |                       |
| <i>Sus scrofa</i>                 | TTTGAC   | TTTGGACACCGCCAAGTCCGGTACAG   | gt       |                       |
| <i>Sus verrucosus</i>             | TTTGAC   | TTTGGACACCGCCAAGTCCGGTACAG   | gt       |                       |
| <i>Sus cebifrons</i>              | TTTGAC   | TTTGGACACCGCCAAGTCCGGTACAG   | gt       |                       |
| <i>Physeter macrocephalus</i>     | TTCCCGC  | --TGGACACGGCCAAGTCCGGTACAG   | gg       |                       |
| <i>Delphinapterus leucas</i>      | -----    | -----                        | -----    | -----                 |
| <i>Lipotes vexillifer</i>         | TTCCCGC  | --TGGACACGGCCAAGTCCGGTACAG   | gg       |                       |
| <i>Balaena mysticetus</i>         | TTCCCGC  | --TGGACACGGCCAAGTCCGGTACAG   | gt       |                       |
| <i>Balaenoptera acutorostrata</i> | TTCCCGC  | --TGGACACGGCCATAGTCCGGTACAG  | gt       |                       |
| <i>Balaenoptera physalus</i>      | TTCCCGC  | --TGGACACGGCCAAGTCCGGTACAG   | gt       |                       |
| <i>Balaenoptera bonaerensis</i>   | TTCCCGC  | --TGGACACGGCCATAGTCCGGTACAG  | gt       |                       |
| <i>Equus asinus</i>               | TTCCCGC  | --TGGACACGGCCAAGTCCGGTGCAG   | gt       |                       |
| <i>Equus quagga boehmi</i>        | TTCCCGC  | --TGGACACGGCCAAGTCCGGTGCAG   | gt       |                       |
| <i>Equus przewalskii</i>          | TTCCCGC  | --TGGACACGGCCAAGTCCGGTGCAG   | gt       |                       |
| <i>Equus caballus</i>             | TTCCCGC  | --TGGACACGGCCAAGTCCGGTGCAG   | gt       |                       |
| <i>Manis pentadactyla</i>         | -----    | -----                        | -----    | -----                 |

**Exon 2**

|                                   | 136      | 140                          | 150                               | 160      | 170      | 180      |
|-----------------------------------|----------|------------------------------|-----------------------------------|----------|----------|----------|
|                                   | ...      | ...                          | ...                               | ...      | ...      | ...      |
| <i>Homo sapiens</i>               | ag       | TCCAAGGTGAATGCCGAC           | CGTCCAGTGTTATTAGGTATAAAAGGTGTCCTG |          |          |          |
| <i>Bradypus variegatus</i>        | ???????? | ????????                     | ????????                          | ???????? | ???????? | ???????? |
| <i>Choloepus hoffmanni</i>        | ???????? | ????????                     | ????????                          | ???????? | ???????? | ???????? |
| <i>Mylodon darwini</i>            | ???????? | ????????                     | ????????                          | ???????? | ???????? | ???????? |
| <i>Cyclopes didactylus</i>        | ???????? | ????????                     | ????????                          | ???????? | ???????? | ???????? |
| <i>Dasypropus novemcinctus</i>    | ag       | ATCCAAGGTGAAGGTGAGAAA        | TCCATGCTATTAAAGTACAAAGGTCTCCTG    |          |          |          |
| <i>Procvavia capensis</i>         | ag       | ATCCAAGGTGAATGGCAGAACTCCAGT  | GCCCTTAGCTATAAAAGGCGTCTTG         |          |          |          |
| <i>Elephas maximus</i>            | ag       | ATCCAAGGTGAATGCCAGACCTCCAGT  | GCCATTAGGTATAAAAGGTGTCTTG         |          |          |          |
| <i>Mammuthus primigenius</i>      | ag       | ATCCAAGGTGAATGCCAGACCTCCAGT  | GCCATTAGGTATAAAAGGTGTCTTG         |          |          |          |
| <i>Loxodonta africana</i>         | ag       | ATCCAAGGTGAATGCCAGACCTCCAGT  | GCCATTAGGTATAAAAGGTGTCTTG         |          |          |          |
| <i>Trichechus manatus</i>         | ag       | ATCCAAGGTGAATGCCAGACCTCCAGT  | GCCATTAGGTATAAAAGGTGTCTTG         |          |          |          |
| <i>Dugong dugon</i>               | ag       | ATCCAAGGTGAATGCCAGACCTCCAGT  | GCCATTAGGTATAAAAGGTGTCTTG         |          |          |          |
| <i>Hydrodamalis gigas</i>         | ag       | ATCCAAGGTGAATGCCAGACCTCCAGT  | GCCATTAGGTATAAAAGGTGTCTTG         |          |          |          |
| <i>Sus scrofa</i>                 | ag       | ATCCAAGGCAAATGCCGGTCCCTCCGGT | TACCATTCCGTACAAAGACGTCTCTG        |          |          |          |
| <i>Sus verrucosus</i>             | ag       | ATCCAAGGCAAATGCCGGTCCCTCCGGT | TACCATTCCGTACAAAGACGTCTCTG        |          |          |          |
| <i>Sus cebifrons</i>              | ag       | ATCCAAGGCAAATGCCGGTCCCTCCGGT | TACCATTCCGTACAAAGACGTCTCTG        |          |          |          |
| <i>Physeter macrocephalus</i>     | ag       | ATCCAATGCGAATGCCAGACCTCCAGT  | GCTGTTAGGTATAAAAAGGTGTCTCTG       |          |          |          |
| <i>Delphinapterus leucas</i>      | -----    | -----                        | -----                             | -----    | -----    | -----    |
| <i>Lipotes vexillifer</i>         | ag       | ATCCAATGCGAATGCCAGACCTCCAGT  | GCTGTTAGGTATAAAAAGGTGTCTCTG       |          |          |          |
| <i>Balaena mysticetus</i>         | ag       | ATCCAATGCGAATGCCAGATCTCCAGT  | GCTGTTAGGTATAAAAAGGTGTCTCTG       |          |          |          |
| <i>Balaenoptera acutorostrata</i> | ag       | ATCCAATGCGAATGCCAGACCTCCAGT  | GCTGTTAGGTATAAAAAGGTGTCTCTG       |          |          |          |

*Balaenoptera physalus*  
*Balaenoptera bonaerensis*  
*Equus asinus*  
*Equus quagga boehmi*  
*Equus przewalskii*  
*Equus caballus*  
*Manis pentadactyla*

agATCCAATGCGAATGCCAGACCTCCAGTGCTGTTAGGTATAAAAGTGTCCCTG  
agATCCAATGCGAATGCCAGACCTCCAGTGCTGTTAGGTATAAAAGTGTCCCTG  
agATCCAAGGCGAGCGCCAGACCTCCAGTGCCCTGAGGTATAACGGTATCCTG  
agATCCAAGGCGAGCGCCAGACCTCCAGTGCCCTGAGGTATAACGGTATCCTG  
agATCCAAGGCGAGCGCCAGACCTCCAGTGCCCTGAGGTATAAAAGGTATCCTG  
agATCCAAGGCGAGCGCCAGACCTCCAGTGCCCTGAGGTATAAAAGGTATCCTG  
-----

*Homo sapiens*  
*Bradypus variegatus*  
*Choloepus hoffmanni*  
*Myiodon darwinii*  
*Cyclopes didactylus*  
*Dasybus novemcinctus*  
*Procyon capensis*  
*Elephas maximus*  
*Mammuthus primigenius*  
*Loxodonta africana*  
*Trichechus manatus*  
*Dugong dugon*  
*Hydrodamalis gigas*  
*Sus scrofa*  
*Sus verrucosus*  
*Sus cebifrons*  
*Physeter microcephalus*  
*Delphinapterus leucas*  
*Lipotes vexillifer*  
*Balaena mysticetus*  
*Balaenoptera acutorostrata*  
*Balaenoptera physalus*  
*Balaenoptera bonaerensis*  
*Equus asinus*  
*Equus quagga boehmi*  
*Equus przewalskii*  
*Equus caballus*  
*Manis pentadactyla*

186 190 200 210 220 230  
|...|...|...|...|...|...|...|...|...|...|...|...|  
GGAACAATCACCCTGTGGTAAAAACAGAAGGGCGGATGAAACTCTACAG  
????????????????????????????????????????????????????  
????????????????????????????????????????????????????  
????????????????????????????????????????????????????  
GGAACAGTTCGCCACTGGCAAAAACGGAAGGGCCAATGAA--CCTACCG  
GAAACAACCACCCTTGACAAAAACAGAGGGGCAATGAAACTATAGCT  
GGAACAATCACTACTCTGGCAAAAACGGAAGAGCCAATGAAACTCTATAG  
GGAACAATCACTACTCTGGCAAAAACGGAAGAGCCAATGAAACTCTATAG  
GGAACAATCACCCTCTGGCAAAAACAGAAGGGCCAATGAAACGCTATAG  
GGAACAATCACCCTCTGGCAAAAACAGAAGGGCCAATGAAACGCTATAG  
GGAACAATCACCCTCTGGCAAAAACAGAAGGGCCAATGAAACGCTATAG  
GGAACAATCACCCTCTGGCAAAAACAGAAGGGCCAATGAAAGCTCTACAG  
GGAACAATCACTACTCTGGCAAAAACAGAAGGGCCAATGAAAGCTCTACAG  
GGAACAATCACCCTCTGGCAAAAACAGAAGGGCCAATGAAACTCTACAG  
GGAACAATCACCCTCTGGCAAAAACAGAAGGGCCAATGAAACTCTACAG  
-----

*Homo sapiens*  
*Bradypus variegatus*  
*Choloepus hoffmanni*  
*Myiodon darwinii*  
*Cyclopes didactylus*  
*Dasybus novemcinctus*  
*Procyon capensis*  
*Elephas maximus*  
*Mammuthus primigenius*  
*Loxodonta africana*  
*Trichechus manatus*  
*Dugong dugon*  
*Hydrodamalis gigas*  
*Sus scrofa*  
*Sus verrucosus*  
*Sus cebifrons*  
*Physeter microcephalus*  
*Delphinapterus leucas*  
*Lipotes vexillifer*

236 240 250 260 270 280  
|...|...|...|...|...|...|...|...|...|...|...|...|  
CGGGCTGCCTGCGGGGCTTCAGCGGCAATCAGCTCCGCTCTCTCAGGA  
????????????????????????????????????????????????????  
????????????????????????????????????????????????????  
????????????????????????????????????????????????????  
CGAGCTGCCTGCTGGCTTCAGAAAACAGATGCACTCCACCCT--AGGA  
--GCTGCCTGCTGGCTTCAGAGACAAATAAGCTTTGCTCTCTTAGAA  
TGGGCTGCCTGCTGGCTTCAGAGACAAATAAGCTTTGCTCTCTTAGGA  
TGGGCTGCCTGCTGGCTTCAGAGACAAATAAGCTTTGCTCTCTTAGGA  
TGGGCTGCCTGCTGGCTTCAGAGACAAATAAGCTTTGCTCTCTTAGGA  
TGGGCTGCCTGCTGGCTTCAGAGACAAATAAGCTTTGCTCTCTTAGGA  
TGGTCTGCCTGCTGGCTTCAGAGACAGATAAGCTTTGCTCTCTTAGGA  
AGGGCTGCCTGCTGGCTTCAGAGACAAATAAAGCTTTACCTCTCTTAGGA  
AGGGCTGCCTGCTGGCTTCAGAGACAAATAAAGCTTTACCTCTCTTAGGA  
AGGGCTGCCTGCTGGCTTCAGAGACAAATAAAGCTTTGCTCTCTTAGGA  
GGGGCTGTCTGCTGGCTTCAGAGACAAATAAGCTTTGCTCTCTTAGGA  
-----  
TGGGCTGCCTGCTGGCTTCAGAGACAAATAAGCTTTGCTCTCTTAGGA

*Balaena mysticetus*  
*Balaenoptera acutorostrata*  
*Balaenoptera physalus*  
*Balaenoptera bonaerensis*  
*Equus asinus*  
*Equus quagga boehmi*  
*Equus przewalskii*  
*Equus caballus*  
*Manis pentadactyla*

CGGGCTGCCTGCTGGCCTCCAGAGACAAATAAGCTTTGCCTCTCTTAGGA  
CGGGCTGCCTGCTGGCCCCAGAGACAAATAAGCTTTGCCTCTCTTAGGA  
TGGGCTGCCAGCTGGCCTCCAGAGACAAATAAGCTTTGCCTCTCTTAGGA  
CGGGCTGCCTGCTGGCCTCCAGAGACAAATAAGCTTTGCCTCTCTTAGGA  
CGGGCTGCCTGCTGGCCTCCAGAGATAAATAAGCTTCGCTCTCTGAGGA  
CGGGCTGCCTGCTGGCCTCCAGAGATAAATAAGCTTCGCTCTCTGAGGA  
CGGGCCGCCTGCTGGCCTCCAGAGATAAATAAGCTTCGCTCTCTGAGGA  
CGGGCCGCCTGCTGGCCTCCAGAGATAAATAAGCTTCGCTCTCTGAGGA

*Homo sapiens*  
*Bradypus variegatus*  
*Choloepus hoffmanni*  
*Myiodon darwini*  
*Cyclopes didactylus*  
*Dasypus novemcinctus*  
*Procyon capensis*  
*Elephas maximus*  
*Mammuthus primigenius*  
*Loxodonta africana*  
*Trichechus manatus*  
*Dugong dugon*  
*Hydrodamalis gigas*  
*Sus scrofa*  
*Sus verrucosus*  
*Sus cebifrons*  
*Physeter macrocephalus*  
*Delphinapterus leucas*  
*Lipotes vexillifer*  
*Balaena mysticetus*  
*Balaenoptera acutorostrata*  
*Balaenoptera physalus*  
*Balaenoptera bonaerensis*  
*Equus asinus*  
*Equus quagga boehmi*  
*Equus przewalskii*  
*Equus caballus*  
*Manis pentadactyla*

286 290 300 310 320 330  
|...|...|...|...|...|...|...|...|...|...|...  
TCGGCCTCTACGACACGGTCCAGGAGTTCTCACCAGGAAAGAAAgT  
????????????????????????????????????????????????  
????????????????????????????????????????????????  
????????????????????????????????????????????????  
????????????????????????????????????????????????  
TGGGACTCTAGGATACCGTCCCGCGGC-TTTCACCAGCAGGAAACCAGca  
TTGGCTTCTGTGACA-GGTTCCAGGAGTACTTCACCTGGAGGAAAGAAAgT  
CTGGCCTCTATGATATGGCCAGGAGTATTCCACTGCAGAGAAAGAAAgT  
CTGGCCTCTATGATATGGCCAGGAGTATTCCACTGCAGAGAAAGAAAgT  
CTGGCCTCTATGATATGGCCAGGAGTATTCCACTGCAGAGAAAGAAAgT  
TTGGCCTCTATGATACTGTCCAGGAGTATTTCACCTGCAGGAAAGAAAgT  
TTGGCCTCTATGATACTGTCCAGGAGTACTTCACCTGCAGGGFAAGAAAgT  
TTGGCCTCTATGATACTGTAGGAGTACTTCACCTGCAGGGFAAGAAAgT  
TCAGCCTCTATGATAACCATCCAGG-----GAGAGAAAgT  
TCACCCTCTATGATAACCATCCAGG-----GAGAGAAAgT  
TCAGCCTCTATGATAACCATCCAGG-----GAGAGAAAgT  
TCAGCCTCTATGAGAGCATCCAGGAGCTCTTCACCACAGGAAAGAAAgT  
-----  
TCAGCCTCTATGAGAGCAT-CAGGAGTTCTTCACCACAGGAAAGAAAgT  
TCAGCATCTATGAAAGCATCCAGGAGTTCTTCACCACAGGAAAGAAAgT  
TCAGCCTCTATGAAAGCATCCAGGAGTTCTTCACCACAGGAAAGAAAgT  
TCAGCCTCTATGAAAGCATCCAGGAGTTCTTCACCACAGGAAAGAAAgT  
TCAGCCTCTATGAAAGCATCCAGGAGTTCTTCACCACAGGAAAGAAAgT  
TTGGCCTCTATGATAACCGTCCAGGAGTTCTTCACCACAGGAAAGAAAgT  
TTGGCCTCTATGATAACCGTCCAGGAGTTCTTCACCACAGGAAAGAAAgT  
TTGGCCTCTATGATAACCGTCCAGGAGTTCTTCACCACAGGAAAGAAAgT  
TTGGCCTCTATGATAACCGTCCAGGAGTTCTTCACCACAGGAAAGAAAgT  
-----

Exon 3

*Homo sapiens*  
*Bradypus variegatus*  
*Choloepus hoffmanni*  
*Myiodon darwini*  
*Cyclopes didactylus*  
*Dasypus novemcinctus*  
*Procyon capensis*  
*Elephas maximus*  
*Mammuthus primigenius*  
*Loxodonta africana*  
*Trichechus manatus*  
*Dugong dugon*  
*Hydrodamalis gigas*  
*Sus scrofa*  
*Sus verrucosus*

334 340 350 360 370 380  
|...|...|...|...|...|...|...|...|...|...|...|...  
agCAGCACCTAGTTT TAGGAAGCAAGATTTTAGCTGGCTAACGACTGGAGGAGT  
????????????????????????????????????????????????  
????????????????????????????????????????????????  
ag-----GTAGTTTAGAAATCAAGATTTTCAGTTGGCTTAACAACCTGGAGAAGT  
????????????????????????????????????????????????  
-----  
aaCTCCAGCTAGTTT TAGGAAGCAAGATCGCTGCTGGCTTAAGGACTGGAGGAGT  
aaCTCCAGCTAGTTT TAGGAAGCAAGATCGCTGCTGGCTTAAGGACTGGAGGAGT  
aaCTCCAGCTAGTTT TAGGAAGCAAGATCGCTGCTGGCTTAAGGACTGGAGGAGT  
agCACCAGCTAGTTT TAGGAAGCAAGATCTCTGCTGGCTTAACGACTGGAGGAGT  
agCACCAGCTAGTTT TAGGAAGCAAGATCTCCGCTGGCTTAACGACTGGAGGAGT  
agCACCAGCTAGTTT TAGGAAGCAAGATCTCCGCTGGCTTAATGACTGGAGGAGT  
-----

*Sus cebifrons* -----  
*Physeter macrocephalus* aa caac ag CTAGTTTAGGAAGCCAGGTCTCAGCGGGCCTAACGACTGGCGGTGT  
*Delphinapterus leucas* -----  
*Lipotes vexillifer* aa caac gg CTAGTTTAGTGAGAAGCAGGGTCTCAGCGGGCCTAACGACTGGCGG  
*Balaena mysticetus* aa caac gg CTAGTTTAGGAAGCAGGGTCTCAGCGGGCCTAACGAATGGCGGCGT  
*Balaenoptera acutorostrata* aa caac gg CTAGTTTAGGAAGCAGGGTCTCAGCGGGCCTAACGAATGGCGGCGT  
*Balaenoptera physalus* aa caac gg CTAGTTTAGGAAGCAGGGTCTCAGCGGGCCTAACGAMTGGCGGCGT  
*Balaenoptera bonaerensis* aa caac gg CTAGTTTAGGAAGCAGGGTCTCAGCGGGCCTAACGACTGGCAGCAT  
*Equus asinus* ag-----CTAGTTTAGGAAGCAAGGTCTCAGCTGGCCTAACGACTGGAGGAGT  
*Equus quagga boehmi* ag-----CTAGTTTAGGAAGCAAGGTCTCAGCTGGCCTAACGACTGGAGGAGT  
*Equus przewalskii* ag-----CTAGTTTAGGAAGCAAGGTCTCAGCTGGCCTAACGACTGGAGGAGT  
*Equus caballus* ag-----CTAGTTTAGGAAGCAAGGTCTCAGCTGGCCTAACGACTGGAGGAGT  
*Manis pentadactyla* agCAACACTTCAGTTTAGGAAGTAAGATCTCAGCTGAGCTAA GACTAAAGGAGA

385 390 400 410 420 430

|...|...|...|...|...|...|...|...|...|...|...|...|...|...|...|  
*Homo sapiens* GGCAGTATTTCATTGGGCAACCCACAGAGGTCTGTAAGTCAGACTTCAAG  
*Bradypus variegatus* ?????????????????????????????????????????????????????????  
*Choloepus hoffmanni* ?????????????????????????????????????????????????????????  
*Mylonodon darwinii* GGCCAT????????????????????????????????????????????????????  
*Cyclopes didactylus* ?????????????????????????????????????????????????????????  
*Dasypus novemcinctus* -----  
*Procavia capensis* -----

GGCAGTGTTCACT GGCAACCCACAGAGGTCTGAGGCTAGACTTCAAG  
*Elephas maximus* GGCAGTGTTCACT GGCAACCCACAGAGGTCTGAGGCTAGACTTCAAG  
*Mammuthus primigenius* GGCAGTGTTCACT GGCAACCCACAGAGGTCTGAGGCTAGACTTCAAG  
*Loxodonta africana* GGCAGTGTTCACT GGCAACCCACAGAGGTCTGAGGCTAGACTTCAAG  
*Trichechus manatus* GGCGGTATTTCATTGGGCAACCCACAGAGGTCTGCAGGTCAGACATCAAG  
*Dugong dugon* GGTGGTATTTCATTGGGCAACCCACAGAGGTCTGCAGGTCAGACATCAAG  
*Hydrodamalis gigas* GGCGGTATTTGCTGGGCAACCCACAGAGGTCTGCAGGTCAGACATCAAG

-----  
*Sus scrofa* -----  
*Sus verrucosus* -----  
*Sus cebifrons* -----

GGCCGTGTTCATTGGGCAACCGCACAGAGGTAGTGAAGGTCAGACTTCAAG  
*Physeter microcephalus* -----TGGTGAAGGTCAGACTTCAAG  
*Delphinapterus leucas* -----  
*Lipotes vexillifer* GGCCGTGTTCGTTGGGCAACCCACAGAGGTAGTGATGTTGTCAGACTTCAAG  
*Balaena mysticetus* GGCCGTGTTCATTGGGCAACCCACAGAGGTAGTGAAGGTCAGACTTCAAG  
*Balaenoptera acutorostrata* GGCCGTGTTCATTGGGCAACCCACAGAGGTAGTGAAGGTCAGACTTCAAG  
*Balaenoptera physalus* GGCTGTGTTCATTGGGCAACCCACAGAGGTAGTGAAGGTCAGACTTCAAG  
*Balaenoptera bonaerensis* GGCCGTGTTCATTGGGCAACCCACAGAGGTAGTGAAGGTCAGACTTCAAG  
*Equus asinus* GGCAGTATTTCATTGGGCAACCCACCGAGGTCATGAAGGTCAGACTTCAAG  
*Equus quagga boehmi* GGCAGTATTTCATTGGGCAACCCACAGAGGTCTGTAAGGTCAGACTTCAAG  
*Equus przewalskii* GGCAGTATTTCATTGGGCAACCCACCGAGGTCGTAAGGTCAGACTTCAAG  
*Equus caballus* GGCAGTATTTCATTGGGCAACCCACCGAGGTCGTAAGGTCAGACTTCAAG  
*Manis pentadactyla* GACAGTATTTATTGGGCAAC CACAGAGGTTGTGAAGGTCAGACTTCAAG

436 440 450 460 470 480

|...|...|...|...|...|...|...|...|...|...|...|...|...|...|...|  
*Homo sapiens* CACAGAGCCATCTCCACGGAATCAAACCTCGCTACACGGGACTTATAAT  
*Bradypus variegatus* ?????????????????????????????????????????????????????????  
*Choloepus hoffmanni* ?????????????????????????????????????????????????????????  
*Mylonodon darwinii* ?????????????????????????????????????????????????????????  
*Cyclopes didactylus* ?????????????????????????????????????????????????????????  
*Dasypus novemcinctus* -----  
*Procavia capensis* -----

CACAGAGCCATCTACATGGTCTCAAACCGTGCTACACTGGGACTTACAAT  
*Elephas maximus* CACAGAGCCATCTACATGGTCTCAAACCGTGCTACACTGGGACTTACAAT  
*Mammuthus primigenius* CACAGAGCCATCTACATGGTCTCAAACCGTGCTACACTGGGACTTACAAT  
*Loxodonta africana* CACAGAGCCATCTACATGGTCTCAAACCGTGCTACACTGGGACTTACAAT  
*Trichechus manatus* TGCAGAGCCATCTATGTGGTCTCAAACCGTGCTACACTGGGACTTACAAT  
*Dugong dugon* TGCAGAGCCATCTGTGTGGTCTCAAACCGCGCTACACTGGGACTTACAAT

*Hydrodamalis gigas* TGCAGAGCCATCTGTGTGGTCTCAAACCGCGCTACACTGGGACTTACAAT  
*Sus scrofa* -----  
*Sus verrucosus* -----  
*Sus cebifrons* -----  
*Physeter microcephalus* CGCCGAGCCGTCTACGTGGTCCCAAACCTCGCCACGCTGGGACTTACAAT  
*Delphinapterus leucas* CGCAGAGCCATCTGCATGGTCCCAAACCTCGCTACACTGGGACTTACAAT  
*Lipotes vexillifer* CGCTGAGCCATCTACGTGGTCCCAAACCTCACTACACTGGGACTTACGAT  
*Balaena mysticetus* TGCCAAGCGGTCTACATGGTCCCAAACCTCGCTACACTGGGACTTACAAT  
*Balaenoptera acutorostrata* CGCCAAGCAGTCTACATGGTCCCAAACCTCGCTACACTGGGACTTACAAT  
*Balaenoptera physalus* CGCCAAGCSGTCTACATGGTCCCAAACCTCGCTACACTGGGACTTACAAT  
*Balaenoptera bonaerensis* CGCCAAGCAGTCTACATGGTCCCAAACCTCGCTACACTGGGACTTACAAT  
*Equus asinus* CGCAGAGCCATCTGCATGGTCCCAAACCTCGCTACACTGGGACTTATAAT  
*Equus quagga boehmi* CGCAGAGCCATCTGCATGGTCCCAAACCTCGCTRCACACTGGGACTTATAAT  
*Equus przewalskii* CGCAGAGCCATCTGCATGGTCCCAAACCGCGCTACACTGGTACTTATAAT  
*Equus caballus* CGCAGAGCCATCTGCATGGTCCCAAACCGCGCTACACTGGTACTTATAAT  
*Manis pentadactyla* CACAGACCCATCCACATGGTGTCAAACCTCACTACATGGGGACTTAC-T

486 490            500            510            520            530  
|...|...|...|...|...|...|...|...|...|...|...  
GCGTACAGAATAATAGCAACAACCGAAGGCTTGACGGGTCTTTGGAAAGgt  
????????????????????????????????????????????????????????????  
????????????????????????????????????????????????????????????  
????????????????????????????????????????????????????????????  
????????????????????????????????????????????????????????????  
-----

*Homo sapiens* GCGTACAGAATAATAGCAACAACCGAAGGCTTGACGGGTCTTTGGAAAGgt  
*Bradypus variegatus* ?????????????????????????????????????????????????????????????  
*Choloepus hoffmanni* ?????????????????????????????????????????????????????????????  
*Mylonodon darwini* ?????????????????????????????????????????????????????????????  
*Cyclopes didactylus* ?????????????????????????????????????????????????????????????  
*Dasypus novemcinctus* -----  
*Procyon capensis* -----  
*Elephas maximus* GCTGACAGAATCATAGCAACAACAGAAGGCTTGACAGGTCTTTGGAAAGgt  
*Mammuthus primigenius* GCTGACAGAATCATAGCAACAACAGAAGGCTTGACAGGTCTTTGGAAAGgt  
*Loxodonta africana* GCTGACAGAATCATAGCAACAACAGAAGGCTTGACAGGTCTTTGGAAAGgt  
*Trichechus manatus* GCTTACAGAATCATAGCAACAACAGAAGGCTTGACAGGTCTTTGAAAGgt  
*Dugong dugon* GCTTACAGAATCATAGCAACAACAGAAGGCTTGACAGGTCTTTGAAAGgt  
*Hydrodamalis gigas* GCTTACAGAATCATAGCAACAACAGAAGGCTTGACAGGTCTTTGAAAGgt  
*Sus scrofa* -----  
*Sus verrucosus* -----  
*Sus cebifrons* -----  
*Physeter microcephalus* GCTCACAGAATTATAGCAACAACAGAAGGCTTGATGGGGCTTTGGAAAGat  
*Delphinapterus leucas* GCTTACAGAATTATAGCAACAACAGAAGGCTTGACGGGCTTTGGAAAGgt  
*Lipotes vexillifer* GCTCACAGAATTATAGCAACAACAGAAAGCTTGACGGGGCTTTGGAAAGgt  
*Balaena mysticetus* GCTTATAGAATTATAGCAACAACAGAAGGCTTGACGGGGCTTTGGAAAGgt  
*Balaenoptera acutorostrata* GCTTACAGAATTATAGCAACAACAGAAGGCTTGATGGGGCTTTGGAAAGgt  
*Balaenoptera physalus* GCTTACAGAATTATAGCAACAACAGAAGGCTTGACGGGGCTTTGGAAAGgt  
*Balaenoptera bonaerensis* GCTTACAGAATTATAGCAACAACAGAAGGCTTGATGGGGCTTTGGAAAGgt  
*Equus asinus* GCCTACAGAATTACAGCAACAACAGAAGGCTGGACGGGTCTTTGGAAAGgt  
*Equus quagga boehmi* GCCTACAGAATTACAGCAACAACAGAAGGCTGGACGGGTCTTTGGAAAGgt  
*Equus przewalskii* GCCTACAGAATTACAGCAACAACAGAAGGCTGGACGGGTCTTTGGAAAGgt  
*Equus caballus* GCCTACAGAATTACAGCAACAACAGAAGGCTGGACGGGTCTTTGGAAAGgt  
*Manis pentadactyla* GCTGACAGAATTAGAGCAACAACAGGCTTGACAGATCTTTGGAAAGct

Exon 4

535 540            550            560            570            580  
|...|...|...|...|...|...|...|...|...|...|...|...  
agGGACTACTCCCAATCTGATGAGAAGTGTTCATCATCAATTGTACAGAGCTAG  
????????????????????????????????????????????????????????????  
????????????????????????????????????????????????????????????  
????????????????????????????????????????????????????????????  
????????????????????????????????????????????????????????????  
-----  
agGGACTACTCTCAGTCTGACAAGAAATATCATCATCAGTTGTACAGAGCTAG

*Mammuthus primigenius* agGGACTACTCTCAGTCTGACAAGAAATATCATCATCAGTTGTACAGAGCTAG  
*Loxodonta africana* agGGACTACTCTCAATCTGACAAGAAATATCATCATCAGTTGTACAGAGCTAG  
*Trichechus manatus* agGGATTACTCCCAATCTGACAAGAAATGTCATCATCAATTTGTACAGAGCTAG  
*Dugong dugon* agGGACTACTCCCAATCTGACAAGAAATGTCATCATCAATTTGTACAGAGCTAG  
*Hydrodamalis gigas* agGGACTACTCCCAATCTGACAAGAAATGTCATCATCAATTTGTACAGAGCTAG  
*Sus scrofa* -----  
*Sus verrucosus* -----  
*Sus cebifrons* -----  
*Physeter macrocephalus* agGTTTACTCCAAATCTGACAAGAATTGTCATCATCGGCTGTACAGAGCTAG  
*Delphinapterus leucas* tcACTTTTATATAGTGCCTCAGCAATTTACTACCGATTTGCTTTCTAGTATGTC  
*Lipotes vexillifer* agGTTTACTCCAAATCTGACAAGAATTGTCATCATCAGCTGTACAGAGCTAG  
*Balaena mysticetus* agGTTTACTCCGAATCTGACAAGAATTGTCATCATCAGCTGTACAGAGCTAG  
*Balaenoptera acutorostrata* agGTTTACTCCGAATCTGACAAGAATTGTCATCATCAGCTGTACAGAGCTAG  
*Balaenoptera physalus* agGTTTACTCCGAATCTGACAAGAATTGTCATCATCAGCTGTACAGAGCTAG  
*Balaenoptera bonaerensis* agGTTTACTCCGAATCTGACAAGAATTGTCATCATCAGCTGTATAGAGCTAG  
*Equus asinus* agGGACCCTCTCAATCTGACAAGAAATGTCATCATCAATTTGTACAGAGCTAG  
*Equus quagga boehmi* agGGACCCTCTCAATCTGACAAGAAATGTCATCATCAATTTGTACAGAGCTAG  
*Equus przewalskii* agGGACCCTCTCAATCTGACAAGAAATGTCATCATCAATTTGTACAGAGCTAG  
*Equus caballus* agGGACCCTCTCAATCTGACAAGAAATGTCATCATCAATTTGTACAGAGCTAG  
*Manis pentadactyla* atGGTCTACTCCCAATCTGATGAGAAATGTCATCATGAATTTGTGCAGAGCTAG

586 590 600 610 620 630  
|. . . |. . . |. . . |. . . |. . . |. . . |. . . |. . . |. . . |. . . |  
*Homo sapiens* TAACATATGATCTAATGAAGGAGGCCTTTGTGAAAAACAACATATTAGCAGgt  
*Bradypus variegatus* ?????????????????????????????????????????????????????????  
*Choloepus hoffmanni* ?????????????????????????????????????????????????????????  
*Mylodon darwini* ?????????????????????????????????????????????????????????  
*Cyclopes didactylus* ?????????????????????????????????????????????????????????  
*Dasypus novemcinctus* -----  
*Procavia capensis* -----  
*Elephas maximus* TAACATATGACCTGATGAAGGAGACCTTTGTGAAAAACAACCTACTAGCAGct  
*Mammuthus primigenius* TAACATATGACCTGATGAAGGAGACCTTTGTGAAAAACAACCTACTAGCAGct  
*Loxodonta africana* TAACATATGACCTGATGAAGGAGACCTTTGTGAAAAACAACCTACTAGCAGct  
*Trichechus manatus* TAACACATGACCTAATGAAGGAGACCTTTGTGAAAAACAATCTACTGGCAGgt  
*Dugong dugon* TAACACATGACCTAATGAAGGAGACCTTTGTGAAAAACAATCTACTGGCAGgt  
*Hydrodamalis gigas* TAACACATGACCTAATGAAGGAGACCTTTGTGAAAAACAATCTACTGGCAGat  
*Sus scrofa* -----  
*Sus verrucosus* -----  
*Sus cebifrons* -----  
*Physeter macrocephalus* TAACATATGACCTAATGAAGGAGGCCCTTTGTGAAAAACA----ATTAACAGgt  
*Delphinapterus leucas* ACTATCTCATTGACATGCTCCTGCCCTTTGTGAAAAACA----ATTAACAGgt  
*Lipotes vexillifer* TAACATATGACCTAATGAAGGAGACCTTTGTGAAAAACA----ATTAACAGgt  
*Balaena mysticetus* TAACGTATGACCTAATGAAGGAGACCTTTGTGAAAAACA----ATTAACAGgt  
*Balaenoptera acutorostrata* TAACGTATGACCTAATGAAGGAGGCCCTTTGTGAAAAACA----ATTAACAGgt  
*Balaenoptera physalus* TAACGTATGCTTAATGAAGGAGGCCCTTTGTGAAAAACA----ATTAACAGgt  
*Balaenoptera bonaerensis* TAACGTATGACCTAATGAAGGAGGCCCTTTGTGAAAAACA----ATTAACAGgt  
*Equus asinus* TAACCCATGACCTAATGAAGGAGGCCCTTTGTGAAAAACCAACTATTAGCAGgt  
*Equus quagga boehmi* TAACCCATGACCTAATGAAGGAGGCCCTTTGTGAAAAACCAACTATTAGCAGgt  
*Equus przewalskii* TAACCCATGACCTAATGAAGGAGGCCCTTTGTGAAAAACCAACTATTAGCAGgt  
*Equus caballus* TAACCCATGACCTAATGAAGGAGGCCCTTTGTGAAAAACCAACTATTAGCAGgt  
*Manis pentadactyla* TAA--GTATGACCTAATGAAGGAGGCACCTCTAAACAAGA----CTTACCAGct

Exon 5

636 640 650 660 670 680  
|. . . |. . . |. . . |. . . |. . . |. . . |. . . |. . . |. . . |. . . |  
*Homo sapiens* agATGACGTCCCCTGCCACTTGGTGTGGCTCTTATCGCTGGATTTTGC---



Bradypus variegatus  
Choloepus hoffmanni  
Mylodon darwini  
Cyclopes didactylus  
Dasypus novemcinctus  
Procvavia capensis  
Elephas maximus  
Mammuthus primigenius  
Loxodonta africana  
Trichechus manatus  
Dugong dugon  
Hydrodamalis gigas  
Sus scrofa  
Sus verrucosus  
Sus cebifrons  
Physeter macrocephalus  
Delphinapterus leucas  
Lipotes vexillifer  
Balaena mysticetus  
Balaenoptera acutorostrata  
Balaenoptera physalus  
Balaenoptera bonaerensis  
Equus asinus  
Equus quagga boehmi  
Equus przewalskii  
Equus caballus  
Manis pentadactyla

????????????????????????????????????????????????????????????  
????????????????????????????????????????????????????????????  
????????????????????????????????????????????????????????????  
????????????????????????????????????????????????????????????

agGTCATGTGCCCTGCCACTTAGTGTCTTCTCTTATCGCTGGATTTTGC---  
agATGACGTGCCCTGCCACTTAGTGTCTTCTCTTATCGCTGGATTTTGC---  
agATGACGTGCCCTGCCACTTAGTGTCTTCTCTTATCGCTGGATTTTGC---  
agATGACGTGCCCTGCCACTTAGTGTCTGCTCTTATCGCTGGATTTTGC---  
agATGATGTGCCCTGCCACTTAGTGTCTGCTCTCATGCTGGATTTTGC---  
agATGATGTGCCCTGCCACTCGGTGTCTGCTCTCATGCTGGATTCTGC---  
agATGATGTGCCCTGCCACTCAGTGTCTGCTCTCATGCTGGATTTTGC---  
-----  
-----  
-----  
agATGATGTGCCCTGTCACCTTTGTGTCCACTGTTATCGCTGGATTTTGC---  
agATGATGTGCCCGTCACTTTGTGTCCGCTGTTATGCTGGATTTTGC---  
agACGATGTGCCCGTCACTTTGTGTCCGCTGTTATCGCTGGATTTTGC---  
agATGATGTGCCCTGTCACCTTTGTGTCCGCTGTTATCGCTGGATTTTGC---  
agATGATGTGCCCTGTCACCTTTGTGTCCGCTGTTATCGCTGGATTTTGC---  
agATGATGTGCCCTGTCACCTTTGTGTCCGCTGTTATCGCTGGATTTTGC---  
agATGATGTGCCCTGTCACCTTTGTGTCCGCTGTTATCGCTGGATTTTGC---  
agATGATGTGCCCTGTCACCTTTGTGTCCGCTGTTATCGCTGGATTTTGC---  
agATGATGTACCTTGCCACTTTGTGTCCGGCTGTCATCGCCAGATTTTGT---  
agATGATGTACCTTGCCACTTTGTGTCCGGCTGTCATCGCCAGATTTTGT---  
agATGATGTACCTTGCCACTTTGTGTCCGGCTGTCATCGCCAGATTTTGT---  
agATGATGTACCTTGCCACTTTGTGTCCGGCTGTCATCGCCAGATTTTGT---  
agATGATGTACC-TGCCACTTTGTATCAGCTCTTATCACC-TGATTTTGTACA

686 690 700 710 720 730  
|...|...|...|...|...|...|...|...|...|...|

Homo sapiens  
Bradypus variegatus  
Choloepus hoffmanni  
Mylodon darwini  
Cyclopes didactylus  
Dasypus novemcinctus  
Procvavia capensis  
Elephas maximus  
Mammuthus primigenius  
Loxodonta africana  
Trichechus manatus  
Dugong dugon  
Hydrodamalis gigas  
Sus scrofa  
Sus verrucosus  
Sus cebifrons  
Physeter microcephalus  
Delphinapterus leucas  
Lipotes vexillifer  
Balaena mysticetus  
Balaenoptera acutorostrata  
Balaenoptera physalus  
Balaenoptera bonaerensis  
Equus asinus  
Equus quagga boehmi  
Equus przewalskii  
Equus caballus  
Manis pentadactyla

-GCAACAGCTATGTCTCCCGGTGGATGTAGTAAAAACCAGATTTATTA  
????????????????????????????????????????????????????????????  
????????????????????????????????????????????????????????????  
????????????????????????????????????????????????????????????  
????????????????????????????????????????????????????????????  
-----  
-----  
-----  
-----  
-ACAATTGTTCTGTCTCTCCACTGGACATGGTGAAAAACCAGATTTGTGA  
-ACAATGGTCTGTCTCTCCAGCAGATGTGGTAAAAACCAGATTTATTA  
-ACAATGGTCTGTCTCTCCAGCAGATGTGGTAAAAACCAGATTTATTA  
-ACAATGGTCTGTCTCTCCAGCAGATGTGGTAAAAACCAGATTTATTA  
-ACAACAGTCTGTTCTCTCCAGTGGATGTGGTAAAAACCAGATTTGTTA  
-ACAACAGTCTCGTCTCTCCAGTGGATGTGGTAAAAACCAGATTTGTTA  
-ACAACAGTCTGTCTCTCCAGTGGATGTGGTAAAAACCAGATTTGTTA  
-----  
-----  
-----  
-----  
-ACAACGGTCTGTCTCTCCAGTGGATGCGGTAAAAACCAGATTTGTGA  
-ACAACGGTCTGTCTCTCCAGTGGATGTGGTAAAAACCAGATTTGTGA  
-ACAACGGTCTGTCTCTCCAGTGGATGTGGTAAAAACCAGATTTGTGA  
-ACAACGGTCTGTCTCTCCAGTGGATGTGGTAAAAACCAGATCTGTGA  
-ACAACGGTCTGTCTCTCCAGTGGATGTGGTAAAAACCAGGTCTGTGA  
-ACAACGGTCTGTCTCTTAGTGGATGTGGTAAAAACCAGATTTGTGA  
-ACAACGGTCTGTCTCTCCAGTGGATGTGGTAAAAACCAGGTCTGTGA  
-ACAACGGTCTGTCTCTCCAGTGGATGTGGTAAAAACCAGGTCTGTGA  
-ACAACGGTCTGTCTCTCCAGTGGATGTGGTAAAAACCAGATTTGTGA  
-ACAACGGTCTGTCTCTCCAGTGGATGTGGTAAAAACCAGATTTGTGA  
-GCAACAGTCTGTCTCTCCAGTGGACATGGTGAAAAACCACATTTGTGA  
-GCAACAGTCTGTCTCTCCAGTGGACATGGTGAAAAACCACATTTGTGA  
-GCAACAGTCTGTCTCTCCAGTGGACATGGTGAAAAACCACATTTGTGA  
-GCAACAGTCTGTCTCTCCAGTGGACATGGTGAAAAACCACATTTGTGA  
AACAATGTTTTGTCCCTCTCGGTGGATATGGTAAAAACCAGATTTGTGA

736 740 750 760 770 780

|                                   |                                                     |
|-----------------------------------|-----------------------------------------------------|
|                                   | ... ... ... ... ... ... ... ... ... ... ...         |
| <i>Homo sapiens</i>               | ATTCTCCACCAGGACAG---TACAAAAGTGTGCCCAACTGTGCAATGAAA  |
| <i>Bradypus variegatus</i>        | ????????????????????????????????????????????????    |
| <i>Choloepus hoffmanni</i>        | ????????????????????????????????????????????????    |
| <i>Myiodon darwinii</i>           | ????????????????????????????????????????????????    |
| <i>Cyclopes didactylus</i>        | ????????????????????????????????????????????????    |
| <i>Dasypus novemcinctus</i>       | -----                                               |
| <i>Procavia capensis</i>          | ATTCTCCACCAAGATAC---TAAACTAGTGTACCCAAACATGCAACCATC  |
| <i>Elephas maximus</i>            | ATTCTCCACCAGGATAC---TACACGAGTGTACCCAAATGCGCAGTGACC  |
| <i>Mammuthus primigenius</i>      | ATTCTCCACCAGGATAC---TACACGAGTGTACCCAAATGCGCAGTGACC  |
| <i>Loxodonta africana</i>         | ATTCTCCACCAGGATAC---TACACGAGTGTACCCAAATGCGCAGTGACC  |
| <i>Trichechus manatus</i>         | ATTCTCCACCAGGATAC---TACACAAGCATACCCAAATGTGCAATGACC  |
| <i>Dugong dugon</i>               | ATTCTCCACCAGGATAC---TACACAAGCATGCCCAATGTGCAATGACC   |
| <i>Hydrodamalis gigas</i>         | ATTCTCCACCAGGATAC---TACACAAGCATACCCAAATGTGCAATGACC  |
| <i>Sus scrofa</i>                 | -----                                               |
| <i>Sus verrucosus</i>             | -----                                               |
| <i>Sus cebifrons</i>              | -----                                               |
| <i>Physeter microcephalus</i>     | ACTGTCTACCGGGACAG---TACACAAGTGTGTCCAACCTGTGCAATGATG |
| <i>Delphinapterus leucas</i>      | ACTGTCTACCGGGACAG---TACACAAGTGTGTCCAACCTGTGCAATGATG |
| <i>Lipotes vexillifer</i>         | ACTGTCTACCGAGACAG---TACATAAGCGTGTCCAACCTGTGCAATGATG |
| <i>Balaena mysticetus</i>         | ACTGTCTACCGGGACGGACACACAAGTGTGTCCGACTGCGCAATGATG    |
| <i>Balaenoptera acutorostrata</i> | ACTGTCTACCGGGACGG---TACACAAGTGTGTCCGACTGCGCAATGTTG  |
| <i>Balaenoptera physalus</i>      | ACTGTCTACCRGGACGG---TACACAAGTGTGTCCGACTGCGCAATGTTG  |
| <i>Balaenoptera bonaerensis</i>   | ACTGTCTACCGGGACGG---TACACAAGTGTGTCCGACTGCGCAATGTTG  |
| <i>Equus asinus</i>               | ATTCTCCACCAGGACAG---TACACAAGTGTGCCCAACTGTGCAACGACA  |
| <i>Equus quagga boehmi</i>        | ATTCTCCACCAGGACAG---TACACAAGTGTGCCCAACTGTGCAACGACA  |
| <i>Equus przewalskii</i>          | ATTCTCCACCAGGACAG---TACACAAGTGTGCCCAACTGTGCAACGACA  |
| <i>Equus caballus</i>             | ATTCTCCACCAGGACAG---TACACAAGTGTGCCCAACTGTGCAACGACA  |
| <i>Manis pentadactyla</i>         | ATTCTCTACCAGGACAA---TGCACAAGTGTGCCCACTGTGCAATGACA   |

|                                   |                                                  |
|-----------------------------------|--------------------------------------------------|
|                                   | 786 790 800 810 820                              |
|                                   | ... ... ... ... ... ... ... ...                  |
| <i>Homo sapiens</i>               | GTGTTTCACTAAGGAAGGACCAACGGC-TTTCTTCAAGGGgt       |
| <i>Bradypus variegatus</i>        | ???????????????????????????????????????????????? |
| <i>Choloepus hoffmanni</i>        | ???????????????????????????????????????????????? |
| <i>Myiodon darwinii</i>           | ???????????????????????????????????????????????? |
| <i>Cyclopes didactylus</i>        | ???????????????????????????????????????????????? |
| <i>Dasypus novemcinctus</i>       | -----                                            |
| <i>Procavia capensis</i>          | ATGTTTACCAAGAAAAGACCACCAGC-TTTTTTCAAAGGgt        |
| <i>Elephas maximus</i>            | ATGTTTACCAAGAAAAGGACTGCCGGC-TTTTTTCAAAGGgt       |
| <i>Mammuthus primigenius</i>      | ATGTTTACCAAGAAAAGGACTGCCGGC-TTTTTTCAAAGGgt       |
| <i>Loxodonta africana</i>         | ATGTTTACCAAGAAAAGGACTGCCGGC-TTTTTTCAAAGGgt       |
| <i>Trichechus manatus</i>         | GTGTTTACCAAGGAAGGACTGCCGGC-TTTTTTCAAAGGgt        |
| <i>Dugong dugon</i>               | GCGTTTACCAGGAAGGACTGCCGGCTTTTTTCAAAGGgt          |
| <i>Hydrodamalis gigas</i>         | GTGTTTACCAGGGAAGGACTGCCGGC-TTTTTTCAAAGGgt        |
| <i>Sus scrofa</i>                 | -----                                            |
| <i>Sus verrucosus</i>             | -----                                            |
| <i>Sus cebifrons</i>              | -----                                            |
| <i>Physeter microcephalus</i>     | GTCCTTCTAAGGAAGGACCATCGGC-TTTTTTCAAAGGgt         |
| <i>Delphinapterus leucas</i>      | ATGCCCTAAGGAAGGACCATCGGC-TTTTTTCAAAGGgt          |
| <i>Lipotes vexillifer</i>         | ATGCTCACTAAGGAAGGACCATCGGC-TTTTTTCAAAGGgt        |
| <i>Balaena mysticetus</i>         | ATGCTCACTAAGGAAGGACCATCGGC-TTTTTTCAAAGGgt        |
| <i>Balaenoptera acutorostrata</i> | ATGCTCACTAAGGAAGGACCATCGGC-TTTTTTCAAAGGgt        |
| <i>Balaenoptera physalus</i>      | ATGCTCACTAAGGAAGGACCATCGGC-TTTTTTCAAAGGgt        |
| <i>Balaenoptera bonaerensis</i>   | ATGCTCACTAAGGAAGGACCATCGGC-TTCTTTCAAAGGgt        |
| <i>Equus asinus</i>               | ATGCTCACTAAGGAAGGACCGTCAGC-TTTTTTCAAAGGgt        |
| <i>Equus quagga boehmi</i>        | ATGCTCACTAAGGAAGGACCGTCAGC-TTTTTTCAAAGGgt        |
| <i>Equus przewalskii</i>          | ATGCTCACTAAGGAAGGACCGTCAGC-TTTTTTCAAAGGgt        |
| <i>Equus caballus</i>             | ATGCTCACTAAGGAAGGACCGTCAGC-TTTTTTCAAAGGgt        |
| <i>Manis pentadactyla</i>         | GTGCTCACTAAGGAAGGACCATCGGC-TTTTTTCAAAGGgc        |

Exon 6

825 830 840 850 860 870  
|. . . .|. . . .|. . . .|. . . .|. . . .|. . . .|. . . .|. . . .|  
*Homo sapiens* agGTTGGTACCTTCCTTCTTGCGACTTGGATCCTGGAACGTCATTATGTTTGT  
*Bradypus variegatus* agGTTTGTGCCTTCCTTCTTGCGACTTAGATCCTGGAATGTCATCATGTTTGA  
*Choloepus hoffmanni* agGTTTGTGCCTTCCTTCTTGAGACTTGGATCC**TGA**AATGTCATCATGTTTGT  
*Mylodon darwinii* ?????????????????????????????????????????????????????????  
*Cyclopes didactylus* agATTTGTACCTTCCTTCTTGCAACTAGGATCCTGGAATGTCATCATGTTTGT  
*Dasypus novemcinctus* agTCTTATGCCTTCCTTCTTG**TGA**CTCAGATCCTGGAATGTTGTATGTTTGT  
*Procavia capensis* agGTTTGTACCTTCCTTCTTG**TGA**CTAAGACTGGGAAGCATCATTAAGTTCAT  
*Elephas maximus* agGCTTGTGCCTTCCTTCTTGCGACTGGGATCCTGGAACGCCATTATGTTTTT  
*Mammuthus primigenius* agGCTTGTGCCTTCCTTCTTGCGACTGGGATCCTGGAACGCCATTATGTTTTT  
*Loxodonta africana* agGCTTGTGCCTTCCTTCTTGCGACTGGGATCCTGGAACGCCATTATGTTTTT  
*Trichechus manatus* agGTTTGTGCCTTCCTTCTTGCGACTCGGTTCTGGAATGTCATTATGTT---T  
*Dugong dugon* agGTTTGTGCCTTCCTTCTTG**TGA**CTCGGATCCTGGAATGTCATTATGTT---T  
*Hydrodamalis gigas* agGTTTGTGCCTTCCTTCTTGCGACTCGGATCCTGGAATGTCATTATGTT---T  
*Sus scrofa* agATTTGTACCTTCCTTCTGG**TGA**CTGGGATCCTGGAACGTCATCCCATTGT  
*Sus verrucosus* agATTTGTACCTTCCTTCTGG**TGA**CTGGGATCCTGGAACGTCATCCCATTGT  
*Sus cebifrons* agATTTGTACCTTCCTTCTGG**TGA**CTGGGATCCTGGAACGTCATCCCATTGT  
*Physeter microcephalus* agATTTGTACCTTCCTTCT**FAGTGA**CTGGGATCCTGGAACATCATCGTGT---GT  
*Delphinapterus leucas* agATTTGTACCTTCCTTCTTG**TGA**CTGGGATCCTGGAACATCATCGTGT---GT  
*Lipotes vexillifer* agATTTGTACCTTCCTTCTTG**TGA**CTGGGATCCTGGAACATCATCGTGT---GT  
*Balaena mysticetus* agATTTGTACCTTCCTTCTTG**TGA**CTGGGATCCTGGAACATCATCGTGT---GT  
*Balaenoptera acutorostrata* agATTTGTACCTTCCTTCTTG**TGA**CTGGGATCCTGGAACATCATCGTGT---GT  
*Balaenoptera physalus* agATTTGTACCTTCCTTCTTG**TGA**CTGGGATCCTGGAACATCATCGTGT---GT  
*Balaenoptera bonaerensis* ?????????????????????????????????????????????????????????  
*Equus asinus* agATTTGTGCCTTCCTTCTTGCGACTCGGATCCTGGCATGTCATCATGTTTGT  
*Equus quagga boehmi* agATTTGTGCCTTCCTTCTTGCGACTCGGATCCTGGCATGTCATCATGTTTGT  
*Equus przewalskii* agATTTGTGCCTTCCTTCTTGCGACTCGGATCCTGGCATGTCATCATGTTTGT  
*Equus caballus* agATTTGTGCCTTCCTTCTTGCGACTCGGATCCTGGCATGTCATCATGTTTGT  
*Manis pentadactyla* agATTTG----TCCCTTCTTGACCTTGGGTCTCCAGACGTCATTATATTTGT

876 880 890 900 910 920  
|. . . .|. . . .|. . . .|. . . .|. . . .|. . . .|. . . .|. . . .|  
*Homo sapiens* GTGCTTTGAACAACCTGAAACGAGAAGTGTCAAAGTCAAGGCAGACTATGGA  
*Bradypus variegatus* GTA---CTGAACAGCTAAAAACAGGAAAGGATGACATCAAGGCCGACTATGGA  
*Choloepus hoffmanni* GTG---TTGAACAGCTAAAAACAGGAAATGATGACATCAAGGCA**ACT**ATGAA  
*Mylodon darwinii* ?????????????????????????????????????????????????????????  
*Cyclopes didactylus* GTG---TTGAACAGCTAAAAACAGAACTGATGACATCAAGGCAGACTATGGA  
*Dasypus novemcinctus* GTACTTTGAACAGCTGAAAACAAGAATTGATGAAGCCAAGGCAGACTATGGA  
*Procavia capensis* GTGCTTTGAACAGCTGAAAAAAGAATTGATGAAGTCGAGGCAGATGATGGA  
*Elephas maximus* GTGCTCTGAACAGCTGAAAACAAGAATTGATGAAGTCAAGGCAGACTATGGG  
*Mammuthus primigenius* GTGCTCTGAACAGCTGAAAACAAGAATTGATGAAGTCAAGGCAGACTATGGG  
*Loxodonta africana* GTGCTCTGAACAGCTGAAAACAAGAATTGATGAAGTCAAGGCAGACTATGGG  
*Trichechus manatus* GTGCTTTGAA**TAC**CTGAAAACGAGAATTGATGAAGTCGAGGGAGACTATGGA  
*Dugong dugon* GTGCTTTGAACAGCTGAAAACGAGAATTGATGAAGTCGAGGCAGACTATGGA  
*Hydrodamalis gigas* GTGCTTTGAACAGCTGAAAACGAGAACTGATGAAGTCGAGGCAGACTATGGA  
*Sus scrofa* GTGCTTTGAACAGCTGAAAACAAGAGTTGATGGAGTCACGGCAGACTGTGGA  
*Sus verrucosus* GTGCTTTGAACAGCTGAAAACAAGAGTTGATGGAGTCACGGCAGACTGTGGA  
*Sus cebifrons* GTGCTTTGAACAGCTGAAAACAAGAGTTGATGGAGTCACGGCAGACTGTGGA  
*Physeter microcephalus* GTGCCTTGAACAGCTGAAGCGAGAAGTCTGAAGTCGAGGCAGACCATGGA  
*Delphinapterus leucas* GTGCTTTGAACAGCTGAAGCGAGAATTGATGAAGTTGAGGCAGACCATGGA  
*Lipotes vexillifer* GTGCTTTGAACAGCTGAAG**TGA**GAATTGATGAAGTTGAGGCAGACCATGGA  
*Balaena mysticetus* GTGCTTTGAACAGCTGAAGCGAGAATTGATGAAGTCGAGGCAGACCATGGA  
*Balaenoptera acutorostrata* GTGCTCTGAACAGCTGCAGCGAGAATTGATGAAGTCGAGGCAGACCATGGA  
*Balaenoptera physalus* GTGCTTTGAACAGCTGAAGMGAGAATTGATGAAGTCGAGGCAGACCATGGA  
*Balaenoptera bonaerensis* ?????????????????????????????????????????????????????????  
*Equus asinus* GTGCTTTGAACAGCTGAAGCGAGAATTGATGAAGTCAACGCAGACCAGGGA

|                                   |                                                                |
|-----------------------------------|----------------------------------------------------------------|
| <i>Equus quagga boehmi</i>        | GTGCTTTGAACAGCTGAAGCGAGAATTGATGAAGTCAACGCAGACCATGGA            |
| <i>Equus przewalskii</i>          | GTGCTTTGAACAGCTGAAGCGAGAATTGATGAAGTCAACGCAGACCATGGA            |
| <i>Equus caballus</i>             | GTGCTTTGAACAGCTGAAGCGAGAATTGATGAAGTCAACGTGACAGACCAT            |
| <i>Manis pentadactyla</i>         | GTGCTCTGAACAAGGAAAA <b>TGA</b> AAATTGACGAACTCAAGG <b>-----</b> |
|                                   | 925 930 940 950                                                |
|                                   | ... ... ... ... ... ...                                        |
| <i>Homo sapiens</i>               | CTGTGCCACA-----TAA                                             |
| <i>Bradypus variegatus</i>        | CTGTGCCACAGCTTCAGGAAAAGAATG <b>-----TAA</b>                    |
| <i>Cyclopes didactylus</i>        | CTTTGCCACA <b>ACTTCAGGAAAAGGATG</b> <b>-----TAA</b>            |
| <i>Choloepus hoffmanni</i>        | CTGTGTCACAGCTTCAGGAAAAGAATGTTAA                                |
| <i>Mylodon darwini</i>            | ????????????????????????????????                               |
| <i>Dasypus novemcinctus</i>       | CTGTGCTACA-----TAA                                             |
| <i>Procavia capensis</i>          | CTGTGCCACA-----TAA                                             |
| <i>Elephas maximus</i>            | CTGTACCACA-----TAA                                             |
| <i>Mammuthus primigenius</i>      | CTGTACCACA-----TAA                                             |
| <i>Loxodonta africana</i>         | CTGTACCACA-----TAA                                             |
| <i>Trichechus manatus</i>         | CTGTGCCACA-----TAA                                             |
| <i>Dugong dugon</i>               | CTGTGCCACA-----TAA                                             |
| <i>Hydrodamalis gigas</i>         | CTGTGCCACA-----TAA                                             |
| <i>Sus scrofa</i>                 | CTGTGCTGCA-----TAA                                             |
| <i>Sus verrucosus</i>             | CTGTGCTGCA-----TAA                                             |
| <i>Sus cebifrons</i>              | CTGTGCTGCA-----TAA                                             |
| <i>Physeter microcephalus</i>     | CTGTGCTACC-----TAA                                             |
| <i>Delphinapterus leucas</i>      | CTGTGCTACC-----TAA                                             |
| <i>Lipotes vexillifer</i>         | CTGTGCTACC-----TAA                                             |
| <i>Balaena mysticetus</i>         | CTGTGCTACC-----TAA                                             |
| <i>Balaenoptera acutorostrata</i> | CTGTGCTACC-----TAA                                             |
| <i>Balaenoptera physalus</i>      | CTGTGCTACC-----TAA                                             |
| <i>Balaenoptera bonaerensis</i>   | ????????????????????????????????                               |
| <i>Equus asinus</i>               | CTGTGCCACA-----TAA                                             |
| <i>Equus quagga boehmi</i>        | CTGTGCCACA-----TAA                                             |
| <i>Equus przewalskii</i>          | CTGTGCCACA-----TAA                                             |
| <i>Equus caballus</i>             | CTGTGCCACA-----TAA                                             |
| <i>Manis pentadactyla</i>         | CTGTGTCATA-----TAA                                             |

**Figure S2. Exon alignments depicting deleterious mutations found in *ucp1* sequences of placental mammal taxa.** The intact human *ucp1* sequence is provided for reference. Mutated initiation codons (green), premature stop codons (red), frameshift insertions (turquoise), deletions (dashes), frameshift deletions (pink), mutated splice sites (yellow), and mutated stop codons (teal) are indicated. Note insert from ~800 bp upstream of *ucp1* in exon 4 of beluga (grey). Missing data are denoted by question marks.

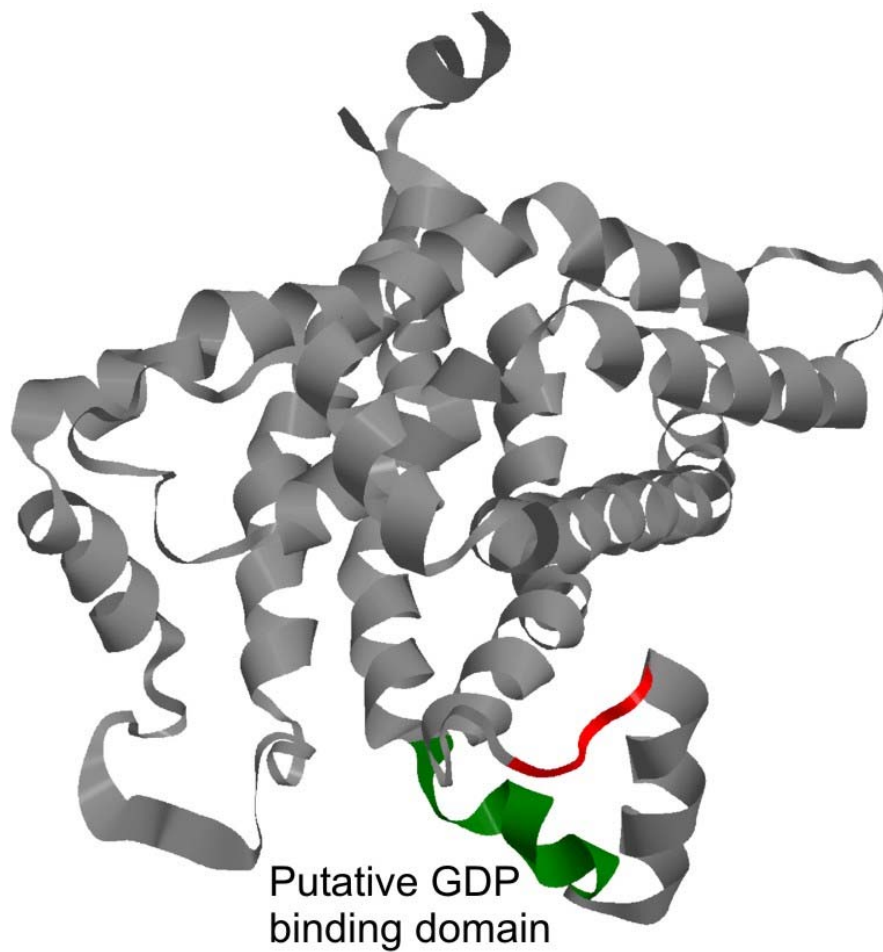

**Figure S3. Ribbon diagram of residues 13 to 304 of human UCP1 (UniProt accession number P25874) structurally modelled by SWISSMODEL.** Residues highlighted in red denote the position of a four amino acid deletion in the third matrix loop of the camel (*Camelus ferus*) UCP1 protein which borders the putative GDP-binding domain (green).





|                             |   |   |   |   |   |   |   |   |   |   |   |   |   |   |   |   |   |   |   |   |   |   |   |   |   |   |   |   |   |   |   |  |
|-----------------------------|---|---|---|---|---|---|---|---|---|---|---|---|---|---|---|---|---|---|---|---|---|---|---|---|---|---|---|---|---|---|---|--|
| <i>Pantholops hodgsonii</i> | M | E | R | S | T | R | E | L | C | L | N | F | T | V | V | L | I | T | V | I | L | I | W | L | L | V | R | S | Y | Q | Y |  |
| <i>Ovis aries</i>           | M | E | R | S | A | R | E | I | C | L | N | F | T | V | V | L | I | T | V | M | L | I | W | L | L | V | R | S | Y | Q | Y |  |
| <i>Capra hircus</i>         | M | E | R | S | T | R | E | I | C | L | N | F | T | V | V | L | I | T | V | I | L | I | W | L | L | V | R | S | Y | Q | Y |  |
| <i>Capra aegagrus</i>       | M | E | R | S | T | R | E | I | C | L | N | F | T | V | V | L | I | T | V | I | L | I | W | L | L | V | R | S | Y | Q | Y |  |
| <i>Bubalus bubalis</i>      | M | E | R | S | T | R | E | L | C | L | N | F | T | V | V | L | I | T | V | I | L | I | W | L | L | V | R | S | Y | Q | Y |  |
| <i>Bison bison</i>          | M | E | R | S | T | R | E | L | C | L | N | F | T | V | V | L | I | T | V | I | L | I | W | L | L | V | R | S | Y | Q | Y |  |
| <i>Bos grunniens</i>        | M | E | R | S | T | R | E | L | C | L | N | F | T | V | V | L | I | T | V | I | L | I | W | L | L | V | R | S | Y | Q | Y |  |
| <i>Bos indicus</i>          | M | E | R | S | T | R | E | L | C | L | N | F | T | V | V | L | I | T | V | I | L | I | W | L | L | V | R | S | Y | Q | Y |  |
| <i>Bos taurus</i>           | M | E | R | S | T | R | E | L | C | L | N | F | T | V | V | L | I | T | V | I | L | I | W | L | L | V | R | S | Y | Q | Y |  |

**Figure S4. Amino acid alignment of vertebrate sarcolipin.** The mutated start codons (ATG→CTG) in the two-toed sloth (*Choleopus hoffmannii*) and brown-throated sloth (*Bradypus variegatus*) were verified from the NCBI sequence read archive and polymerase chain reaction amplification, respectively. Amino acid deletions in the equid lineage are highlighted in red. Note that two sarcolipin gene copies were found in the *Xenopus tropicalis*, *Monodelphis domestica*, and *Physeter macrocephalus* assemblies. Missing data denoted by question marks.



**Table S1. GenBank accession numbers of species used in this study.**

| <i>Species name</i>          | <i>ucp1 Source</i>               | <i>ucp2 Source</i>               | <i>ucp3 Source</i>               | <i>sln Source</i> |
|------------------------------|----------------------------------|----------------------------------|----------------------------------|-------------------|
| <b>Osteichthyes</b>          |                                  |                                  |                                  |                   |
| <i>Astyanax mexicanus</i>    | APWO01100404.1<br>APWO01100403.1 | APWO01075838.1                   | APWO01075838.1                   | Missing           |
| <i>Cyprinus carpio</i>       | AY461434.2                       | AJ243486.1                       | AY505343.1                       | Missing           |
| <i>Danio rerio</i>           | CABZ01073633.1<br>CABZ01073634.1 | CABZ01017713.1                   | CABZ01012840.1<br>CABZ01017713.1 | NM_001302745.1    |
| <i>Latimeria chalumnae</i>   | AFYH01226130.1<br>AFYH01226129.1 | BAHO01089108.1<br>AFYH01155949.1 | Missing                          | AFYH01102483.1    |
| <i>Lepisosteus oculatus</i>  | AHAT01015452.1                   | AHAT01003069.1                   | AHAT01003069.1                   | AHAT01003063.1    |
| <i>Takifugu rubripes</i>     | CAAB02001533.1                   | CAAB02000575.1                   | CAAB02000575.1                   | CAAB02007733.1    |
| <i>Xiphophorus maculatus</i> | AGAJ01004818.1<br>AGAJ01004819.1 | AGAJ01021216.1                   | AGAJ01021216.1                   | AGAJ01040366.1    |

**Amphibia**

|                           |                |             |                |                                  |
|---------------------------|----------------|-------------|----------------|----------------------------------|
| <i>Xenopus tropicalis</i> | AAMC02004107.1 | NM_203848.1 | NM_001095178.1 | AAMC02008311.1<br>AAMC02008313.1 |
|---------------------------|----------------|-------------|----------------|----------------------------------|

**Montremata**

|                                 |                |                                                                      |                                  |                |
|---------------------------------|----------------|----------------------------------------------------------------------|----------------------------------|----------------|
| <i>Ornithorhynchus anatinus</i> | NW_001794248.1 | AAPN01056149.1<br>AAPN01056148.1<br>AAPN01056147.1<br>AAPN01382618.1 | AAPN01178604.1<br>AAPN01178605.1 | AAPN01035927.1 |
|---------------------------------|----------------|----------------------------------------------------------------------|----------------------------------|----------------|

**Marsupialia**

|                                  |                                                                                             |                                    |                                                                                             |                                  |
|----------------------------------|---------------------------------------------------------------------------------------------|------------------------------------|---------------------------------------------------------------------------------------------|----------------------------------|
| <i>Monodelphis domestica</i>     | AAFR03015618.1                                                                              | AAFR03050488.1                     | AAFR03050488.1                                                                              | AAFR03009954.1<br>AAFR03043596.1 |
| <i>Macropus eugenii</i>          | ABQO020217652.1<br>ABQO020162103.1<br>ABQO020106554.1<br>ABQO020051005.1<br>ABQO021106434.1 | ABQO020850797.1<br>ABQO020012246.1 | ABQO020339531.1<br>ABQO020395080.1<br>ABQO020450629.1<br>ABQO020707648.1<br>ABQO020652099.1 | ABQO020365261.1                  |
| <i>Sarcophilus harrisii</i>      | AEFK01228715.1<br>AEFK01215941.1                                                            | AFEY01422591.1                     | AFEY01409403.1<br>AFEY01344314.1<br>AFEY01422590.1                                          | AFEY01139015.1                   |
| <i>Sminthopsis crassicaudata</i> | EF622232.1                                                                                  | Missing                            | Missing                                                                                     | Missing                          |

**Xenarthra**

|                             |                |                        |                                     |                |
|-----------------------------|----------------|------------------------|-------------------------------------|----------------|
| <i>Choloepus hoffmanni</i>  | ABVD02364175.1 | ABVD01312484.1         | ABVD02315747.1                      | ABVD02284044.1 |
| <i>Bradypus variegatus</i>  | KY886638       | Missing                | Missing                             | KY886670       |
| <i>Cyclopes didactylus</i>  | KY886639       | Missing                | Missing                             | Missing        |
| <i>Dasybus novemcinctus</i> | AAGV03181320.1 | AAGV03150769.1         | AAGV03292997.1<br>AAGV03292996.1    | AAGV03173212.1 |
| <i>Myiodon darwini</i>      | SRX327588      | SRX327588<br>SRX327589 | SRX327588<br>SRX327589<br>SRX465052 | SRX327588      |

**Afrotheria**

|                                       |                                  |                        |                                   |                        |
|---------------------------------------|----------------------------------|------------------------|-----------------------------------|------------------------|
| <i>Chrysochloris asiatica</i>         | AMDV01244955.1<br>AMDV01244956.1 | AMDV01302651.1         | AMDV01302653.1                    | AMDV01027313.1         |
| <i>Dugong dugon</i>                   | KY886640                         | KY886652               | KY886661                          | KY886671               |
| <i>Echinops telfairi</i>              | AAIY02209271.1                   | AAIY02169770.1         | AAIY02169772.1                    | AAIY02172361.1         |
| <i>Elephantulus edwardii</i>          | AMGZ01097263.1                   | AMGZ01085574.1         | AMGZ01085576.1;<br>AMGZ01085575.1 | AMGZ01226582.1         |
| <i>Elephas maximus</i>                | KY886642                         | ERX334764<br>ERX334765 | ERX334764<br>ERX334765            | ERX334764<br>ERX334765 |
| <i>Hydrodamalis gigas</i>             | KY886641                         | KY886653               | KY886662                          | KY886672               |
| <i>Loxodonta africana</i>             | AAGU03034821.1                   | AAGU03079300.1         | AAGU03079300.1                    | AAGU03058675.1         |
| <i>Mammuthus primigenius</i>          | ERP008929                        | ERP008929              | ERP008929                         | ERP008929              |
| <i>Orycteropus afer</i>               | ALYB01104541.1<br>ALYB01104543.1 | ALYB01103367.1         | ALYB01103365.1                    | ALYB01161748.1         |
| <i>Procapra capensis</i>              | ABRQ02143236.1                   | ABRQ02011699.1         | ABRQ02011697.1                    | ABRQ02037372.1         |
| <i>Trichechus manatus latirostris</i> | AHIN01109623.1<br>AHIN01109624.1 | AHIN01084584.1         | AHIN01084587.1                    | AHIN01088368.1         |

### Laurasiatheria

|                                   |                                                       |                                  |                                                    |                 |
|-----------------------------------|-------------------------------------------------------|----------------------------------|----------------------------------------------------|-----------------|
| <i>Acinonyx jubatus</i>           | LLWD01000416.1                                        | LLWD01000509.1                   | LLWD01000509.1                                     | LLWD01000070.1  |
| <i>Ailuropoda melanoleuca</i>     | ACTA01016457.1                                        | ACTA01146014.1                   | ACTA01130015.1                                     | ACTA01090054.1  |
| <i>Balaena mysticetus</i>         | KY886643                                              | Missing                          | Missing                                            | Missing         |
| <i>Balaenoptera acutorostrata</i> | ATDI01065547.1                                        | ATDI01094623.1                   | ATDI01094627.1                                     | ATDI01043778.1  |
| <i>Balaenoptera bonaerensis</i>   | BAUQ01197845.1<br>BAUQ01696173.1<br>BAUQ01341929.1    | BAUQ01410165.1                   | BAUQ01284797.1                                     | BAUQ01341977.1  |
| <i>Balaenoptera physalus</i>      | SRX323050                                             | SRX323050                        | SRX323050                                          | SRX323050       |
| <i>Bison bison</i>                | JPYT01100523.1                                        | JPYT01642782.1                   | JPYT01019071.1                                     | JPYT01254401.1  |
| <i>Bos grunniens</i>              | AGSK01075302.1                                        | AGSK01058532.1<br>[Misassembled] | AGSK01132661.1<br>AGSK01132663.1<br>[Misassembled] | AGSK01136949.1  |
| <i>Bos indicus</i>                | AGFL01142555.1<br>AGFL01142556.1                      | AGFL01131821.1                   | AGFL01131836.1<br>AGFL01131835.1                   | AGFL01128732.1  |
| <i>Bos taurus</i>                 | DAAA02044420.1<br>DAAA02044421.1                      | AAFC03092999.1                   | NM_174210.1                                        | AAFC03004956.1  |
| <i>Bubalus bubalis</i>            | AWWX01630119.1                                        | AWWX01596091.1                   | AWWX01532946.1                                     | AWWX01539210.1  |
| <i>Camelus ferus</i>              | AGVR01051296.1                                        | AGVR01023127.1                   | AGVR01023127.1                                     | AGVR01041834.1  |
| <i>Canis lupus familiaris</i>     | NM_001003046.1                                        | AAEX03012810.1                   | NM_001003047.1                                     | AOCS01147984.1  |
| <i>Capra aegagrus</i>             | CBYH010071014                                         | CBYH010041467.1                  | CBYH010041467.1                                    | JXYW01145092.1  |
| <i>Capra hircus</i>               | AJPT01162993.1                                        | JN986832.1                       | AJPT01151377.1                                     | AJPT01148506.1  |
| <i>Capreolus capreolus</i>        | CCMK010104759.1<br>CCMK012865005.1<br>CCMK010278719.1 | CCMK010138775.1                  | CCMK010008945.1                                    | CCMK010366203.1 |
| <i>Ceratotherium simum</i>        | AKZM01017598.1                                        | AKZM01032604.1                   | AKZM01032604.1                                     | AKZM01019766.1  |
| <i>Choeropsis liberiensis</i>     | KY886644                                              | KY886654                         | KY886663                                           | Missing         |
| <i>Coelodonta antiquitatis</i>    | KY886645                                              | KY886655                         | KY886664                                           | KY886673        |
| <i>Condylura cristata</i>         | AJFV01047153.1                                        | AJFV01042335.1                   | AJFV01042336.1                                     | AJFV01057960.1  |
| <i>Delphinapterus leucas</i>      | KY886646                                              | KY886656                         | KY886665                                           | Missing         |
| <i>Diceros bicornis</i>           | KY886647                                              | KY886657                         | KY886666                                           | KY886674        |

|                                  |                                                        |                                     |                                                    |                                     |
|----------------------------------|--------------------------------------------------------|-------------------------------------|----------------------------------------------------|-------------------------------------|
| <i>Dicerorhinus sumatrensis</i>  | KY886648                                               | KY886658                            | KY886667                                           | KY886675                            |
| <i>Eidolon helvum</i>            | AWHC01029981.1                                         | AWHC01218500.1                      | AWHC01218502.1<br>AWHC01218501.1                   | AWHC01196379.1                      |
| <i>Eptesicus fuscus</i>          | ALEH01005956.1                                         | ALEH01084492.1                      | ALEH01084495.1;<br>ALEH01084494.1                  | ALEH01120006.1                      |
| <i>Equus asinus</i>              | SRX290673<br>SRX290675<br>SRX290677                    | SRX290673<br>SRX290675<br>SRX290677 | SRX290673<br>SRX290675<br>SRX290677                | ERX607030<br>ERX607036<br>ERX607001 |
| <i>Equus caballus</i>            | AAWR02018851.1                                         | AAWR02018167.1                      | AAWR02018167.1                                     | AAWR02020714.1                      |
| <i>Equus przewalskii</i>         | ATBW01036321.1<br>ATBW01036320.1                       | ATBW01058700.1<br>ATBW01058701.1    | ATBW01058699.1                                     | ATBW01057363.1                      |
| <i>Equus quagga boehmi</i>       | KY886649                                               | Missing                             | Missing                                            | Missing                             |
| <i>Erinaceus europaeus</i>       | AMDU01193160.1<br>AMDU01193161.1<br>AMDU01193162.1     | AANN01307683.1                      | AMDU01063251.1<br>AMDU01063252.1<br>AMDU01063253.1 | AANN01527796.1                      |
| <i>Felis catus</i>               | ACBE01132808.1<br>ACBE01132809.1                       | AANG02100994.1                      | AANG02100994.1                                     | ACBE01332355.1                      |
| <i>Leptonychotes weddellii</i>   | APMU01141180.1<br>APMU01115166.1                       | APMU01037391.1                      | APMU01037393.1                                     | APMU01115847.1                      |
| <i>Lipotes vexillifer</i>        | AUPI01000024.1<br>AUPI01000025.1                       | AUPI01017650.1                      | AUPI01017651.1                                     | AUPI01060449.1                      |
| <i>Manis pentadactyla</i>        | JPTV01131901.1                                         | JPTV01099221.1                      | JPTV01146288.1                                     | JPTV01082441.1                      |
| <i>Megaderma lyra</i>            | AWHB01348443.1<br>AWHB01348444.1                       | AWHB01174334.1<br>AWHB01174333.1    | AWHB01278871.1<br>AWHB01278872.1                   | AWHB01215178.1                      |
| <i>Mustela putorius furo</i>     | AGTQ01041845.1                                         | AGTQ01009941.1                      | AGTQ01009939.1                                     | AEYP01061363.1                      |
| <i>Myotis brandtii</i>           | ANKR01273868.1<br>ANKR01273869.1                       | ANKR01210024.1                      | ANKR01210023.1                                     | ANKR01318413.1                      |
| <i>Myotis davidii</i>            | ALWT01125743.1                                         | ALWT01314732.1<br>ALWT01314733.1    | ALWT01314729.1                                     | ALWT01118440.1                      |
| <i>Myotis lucifugus</i>          | AAPE02001462.1                                         | AAPE02040816.1                      | AAPE02040815.1<br>AAPE02040816.1                   | AAPE02047638.1                      |
| <i>Neovison vison</i>            | EU360729.1                                             | EU360730.1                          | Missing                                            | Missing                             |
| <i>Odobenus rosmarus</i>         | ANOP01028105.1                                         | ANOP01000820.1                      | ANOP01000821.1                                     | ANOP01017035.1                      |
| <i>Orcinus orca</i>              | ANOL02004931.1<br>(Deleted gene -<br>Synteny analysis) | ANOL02054064.1                      | ANOL02054065.1                                     | ANOL02064465.1                      |
| <i>Ovis aries</i>                | JN604985.1                                             | CBYI010055183.1                     | CBYI010055184.1                                    | ACIV011354444.1                     |
| <i>Panthera tigris altaica</i>   | ATCQ01112915.1                                         | ATCQ01048793.1                      | ATCQ01048791.1                                     | ATCQ01029167.1                      |
| <i>Panthera uncia</i>            | SRX273036                                              | SRX273036                           | SRX273036                                          | SRX273036                           |
| <i>Pantholops hodgsonii</i>      | AGTT01188813.1                                         | AGTT01169141.1                      | AGTT01169136.1                                     | AGTT01037849.1                      |
| <i>Phoca vitulina</i>            | AB921529.1                                             | Missing                             | Missing                                            | Missing                             |
| <i>Physeter macrocephalus</i>    | AWZP01062081.1                                         | AWZP01062236.1                      | AWZP01062236.1                                     | AWZP01043685.1<br>AWZP01078901.1    |
| <i>Pteropus alecto</i>           | ALWS01011689.1                                         | ALWS01169197.1                      | ALWS01169198.1<br>ALWS01169197.1                   | ALWS01050977.1                      |
| <i>Pteropus vampyrus</i>         | ABRP02126915.1                                         | ABRP02138358.1                      | ABRP02138358.1                                     | ABRP02100214.1                      |
| <i>Rhinoceros unicornis</i>      | KY886650                                               | KY886659                            | KY886668                                           | KY886676                            |
| <i>Rhinolophus ferrumequinum</i> | AWHA01040305.1<br>AWHA01040304.1                       | AWHA01096410.1                      | AWHA01092973.1<br>AWHA01092975.1                   | AWHA01130749.1                      |

|                           |                                                        |                           |                                  |                           |
|---------------------------|--------------------------------------------------------|---------------------------|----------------------------------|---------------------------|
| <i>Sorex araneus</i>      | AALT02056093.1                                         | AALT02155451.1            | AALT02155448.1<br>AALT02155449.1 | AALT02042376.1            |
| <i>Suncus murinus</i>     | AB244816.1                                             | Missing                   | Missing                          | Missing                   |
| <i>Sus cebriifrons</i>    | ERX149172                                              | ERX149172                 | ERX149172                        | ERX149172                 |
| <i>Sus scrofa</i>         | DQ372918.1                                             | NM_214289.1               | NM_214049.1                      | AJKK01191606.1            |
| <i>Sus verrucosus</i>     | ERX1054048-<br>ERX1054067                              | ERX1054048-<br>ERX1054067 | ERX1054048-<br>ERX1054067        | ERX1054048-<br>ERX1054067 |
| <i>Tapirus indicus</i>    | KY886651                                               | KY886660                  | KY886669                         | KY886677                  |
| <i>Tursiops truncatus</i> | ABRN02199412.1<br>(Deleted gene -<br>Synteny analysis) | ABRN02011700.1            | ABRN02011697.1                   | ABRN02379235.1            |
| <i>Ursus maritimus</i>    | AVOR01014285.1                                         | AVOR01090225.1            | AVOR01090228.1                   | AVOR01032007.1            |
| <i>Vicugna pacos</i>      | ABRR02134987.1                                         | ABRR02047266.1            | ABRR02047266.1                   | ABRR02146164.1            |

### Euarchontoglires

|                                     |                                                                          |                                                                                             |                                                    |                 |
|-------------------------------------|--------------------------------------------------------------------------|---------------------------------------------------------------------------------------------|----------------------------------------------------|-----------------|
| <i>Aotus nancymaae</i>              | JYKP01215429.1                                                           | JYKP01068224.1                                                                              | JYKP01068227.1                                     | JYKP01155709.1  |
| <i>Apodemus sylvaticus</i>          | LIPJ01014497.1<br>LIPJ01184746.1                                         | LIPJ01041350.1                                                                              | LIPJ01000433.1                                     | LIPJ01004285.1  |
| <i>Callithrix jacchus</i>           | ACFV01002817.1<br>ACFV01002818.1                                         | ACFV01035072.1                                                                              | ACFV01035065.1<br>ACFV01035066.1<br>ACFV01035067.1 | JRUL010233331.1 |
| <i>Cavia aperea</i>                 | AVPZ01000778.1                                                           | AVPZ01000005.1                                                                              | AVPZ01000005.1                                     | AVPZ01000041.1  |
| <i>Cavia porcellus</i>              | AAKN02011801.1                                                           | AAKN02051191.1                                                                              | AAKN02051190.1                                     | AAKN02053822.1  |
| <i>Cercocebus atys</i>              | JZLG01060688.1                                                           | JZLG01056565.1                                                                              | JZLG01056561.1                                     | JZLG01010897.1  |
| <i>Chinchilla lanigera</i>          | AGCD01027651.1<br>AGCD01027652.1                                         | AGCD01015245.1                                                                              | AGCD01015243.1                                     | AGCD01012756.1  |
| <i>Chlorocebus sabaues</i>          | AQIB01017419.1                                                           | AQIB01134135.1                                                                              | AQIB01134133.1                                     | AQIB01093034.1  |
| <i>Colobus angolensis</i>           | JYKR01122839.1<br>JYKR01122838.1<br>JYKR01122837.1                       | JYKR01062401.1                                                                              | JYKR01062397.1                                     | JYKR01171003.1  |
| <i>Cricetulus griseus</i>           | AFTD01128394.1                                                           | AFTD01106142.1                                                                              | AFTD01106142.1                                     | APMK01041211.1  |
| <i>Daubentonia madagascariensis</i> | AGTM011584996.1<br>AGTM011708528.1<br>AGTM012010142.1<br>AGTM011594144.1 | AGTM010366851.1<br>AGTM012942927.1<br>AGTM010409851.1<br>AGTM011996042.1<br>AGTM011949823.1 | AGTM010372645.1<br>AGTM011680642.1                 | AGTM011625695.1 |
| <i>Dicrostonyx groenlandicus</i>    | AF515781.1                                                               | Missing                                                                                     | Missing                                            | Missing         |
| <i>Dipodomys ordii</i>              | ABRO02057411.1                                                           | ABRO02020382.1                                                                              | ABRO02020382.1                                     | ABRO02010842.1  |
| <i>Eulemur flavifrons</i>           | LGHW01000184.1                                                           | LGHW01005764.1                                                                              | LGHW01005764.1                                     | LGHW01001219.1  |
| <i>Eulemur macaco</i>               | LGHX01000184.1                                                           | LGHX01005675.1                                                                              | LGHX01005675.1                                     | LGHX01001209.1  |
| <i>Fukomys damarensis</i>           | AYUG01151055<br>AYUG01151056                                             | AYUG01134562.1<br>AYUG01134563.1                                                            | AYUG01134566.1<br>AYUG01134565.1                   | AYUG01150094.1  |
| <i>Galeopterus variegatus</i>       | JMZW01045216.1<br>JMZW01045217.1                                         | JMZW01159785.1<br>JMZW01159786.1                                                            | JMZW01159781.1                                     | JMZW01093471.1  |
| <i>Gorilla gorilla gorilla</i>      | NW_004002547.1                                                           | NW_004005093.1                                                                              | NW_004005093.1                                     | CABD030081410.1 |
| <i>Heterocephalus glaber</i>        | AFSB01162372.1                                                           | AFSB01032172.1                                                                              | AFSB01032171.1                                     | AFSB01080593.1  |
| <i>Homo sapiens</i>                 | NG_012139.1                                                              | U82819.1                                                                                    | U84763.1                                           | U96094.1        |

|                                      |                                                    |                                  |                                                                      |                |
|--------------------------------------|----------------------------------------------------|----------------------------------|----------------------------------------------------------------------|----------------|
| <i>Jaculus jaculus</i>               | AKZC01091543.1                                     | AKZC01100636.1<br>AKZC01100637.1 | AKZC01100628.1<br>AKZC01100629.1<br>AKZC01100630.1<br>AKZC01100632.1 | AKZC01057088.1 |
| <i>Macaca fascicularis</i>           | CAEC01514737.1                                     | AEHL01150243.1                   | AEHL01150254.1;<br>AEHL01150253.1                                    | CAEC01142624.1 |
| <i>Macaca mulatta</i>                | AANU01271750.1                                     | AANU01189618.1                   | AANU01189616.1                                                       | AEHK01077455.1 |
| <i>Macaca nemestrina</i>             | JZLF01028562.1                                     | JZLF01057018.1                   | JZLF01057022.1                                                       | JZLF01029339.1 |
| <i>Mandrillus leucophaeus</i>        | JYKQ01107155.1<br>JYKQ01107156.1                   | JYKQ01166891.1                   | JYKQ01166885.1                                                       | JYKQ01102438.1 |
| <i>Marmota marmota</i>               | CZRN01000015.1                                     | CZRN01000004.1                   | CZRN01000004.1                                                       | CZRN01000026.1 |
| <i>Mesocricetus auratus</i>          | NM_001281332.1                                     | APMT01084061.1                   | APMT01084061.1                                                       | APMT01047702.1 |
| <i>Microcebus murinus</i>            | ABDC01082367.1                                     | ABDC01179060.1                   | ABDC01179052.1<br>ABDC01179053.1                                     | ABDC02015405.1 |
| <i>Microtus agrestis</i>             | LIQJ01004042.1                                     | LIQJ01014426.1                   | LIQJ01014426.1                                                       | LIQJ01000448.1 |
| <i>Microtus ochrogaster</i>          | AHZW01157106.1                                     | AHZW01107615.1                   | AHZW01107615.1                                                       | AHZW01020748.1 |
| <i>Mus musculus</i>                  | CAAA01024310.1                                     | CAAA01006333.1                   | AAHY01064811.1                                                       | AAHY01078220.1 |
| <i>Myodes glareolus</i>              | LIPI01003929.1                                     | LIPI01011290.1                   | LIPI01011290.1                                                       | LIPI01022398.1 |
| <i>Nannospalax galili</i>            | AXCS01128925.1                                     | AXCS01188952.1                   | AXCS01188951.1                                                       | AXCS01045434.1 |
| <i>Nasalis larvatus</i>              | JMHX01319533.1                                     | JMHX01319543.1                   | CM003003.1                                                           | JMHX01319543.1 |
| <i>Nomascus leucogenys</i>           | ADFV01177960.1<br>ADFV01177959.1                   | ADFV01111583.1                   | ADFV01111578.1<br>ADFV01111580.1                                     | ADFV01056290.1 |
| <i>Ochotona dauurica</i>             | AB283043.1                                         | Missing                          | Missing                                                              | Missing        |
| <i>Ochotona princeps</i>             | ALIT01060999.1                                     | AAYZ01137505.1                   | AAYZ01237828.1                                                       | AAYZ01218708.1 |
| <i>Octodon degus</i>                 | AJSA01193670.1<br>AJSA01193671.1                   | AJSA01174660.1                   | AJSA01174659.1<br>AJSA01174660.1                                     | AJSA01031476.1 |
| <i>Oryctolagus cuniculus</i>         | NM_001171077.1                                     | AAGW02008192.1                   | AAGW02008192.1                                                       | AAGW02009195.1 |
| <i>Otolemur garnettii</i>            | AAQR03074138.1                                     | AAQR03001165.1                   | AAQR03001162.1                                                       | AAQR03181843.1 |
| <i>Pan paniscus</i>                  | AJFE01070904.1                                     |                                  | AJFE01047917.1                                                       | AJFE01100549.1 |
| <i>Pan troglodytes</i>               | AACZ03032212.1<br>AACZ03032211.1                   | AACZ03079660.1                   | AADA01222375.1                                                       | AADA01279835.1 |
| <i>Papio anubis</i>                  | AHZZ01043343.1                                     | AHZZ01024419.1                   | AHZZ01024424.1                                                       | AHZZ01040054.1 |
| <i>Papio hamadryas</i>               | PreEnsembl                                         | Missing                          | Missing                                                              | Missing        |
| <i>Peromyscus maniculatus</i>        | AYHN01134223.1<br>AYHN01134224.1                   | AYHN01057054.1                   | AYHN01057054.1                                                       | AYHN01010930.1 |
| <i>Phodopus sungorus</i>             | AF271263.1                                         | AF271264.1                       | AF271265.2                                                           | Missing        |
| <i>Pongo abelii</i>                  | ABGA01062109.1<br>ABGA01062111.1                   | ABGA01223176.1<br>ABGA01223175.1 | ABGA01223178.1                                                       | ABGA01383648.1 |
| <i>Propithecus coquereli</i>         | JZKE01017273.1<br>JZKE01017272.1<br>JZKE01017271.1 | JZKE01114303.1                   | JZKE01114303.1                                                       | JZKE01236593.1 |
| <i>Rattus norvegicus</i>             | AAHX01097782.1                                     | AAHX01007471.1                   | AABR06007535.1                                                       | AAHX01054738.1 |
| <i>Rhinopithecus roxellana</i>       | JABR01098768.1                                     | JABR01036514.1                   | JABR01036511.1                                                       | JABR01016757.1 |
| <i>Saimiri boliviensis</i>           | AGCE01051213.1                                     | AGCE01022106.1                   | AGCE01022109.1                                                       | AGCE01023439.1 |
| <i>Spermophilus tridecemlineatus</i> | AGTP01049379.1                                     | AAQQ01149310.1                   | AGTP01028875.1                                                       | AAQQ01672914.1 |
| <i>Tarsius syrichta</i>              | ABRT02355485.1<br>ABRT02355484.1                   | ABRT02455082.1                   | ABRT02455086.1<br>ABRT02455085.1                                     | ABRT02333009.1 |
| <i>Tupaia belangeri chinensis</i>    | ALAR01031044.1                                     | ALAR01010153.1                   | ALAR01010154.1                                                       | ALAR01067265.1 |

**Table S2. Likelihood ratio tests for *ucp1* CODEML models.** The M2 pseudogene branch model was tested against individual branch models (M2), with additional branch categories for the camel, pygmy hippopotamus, stem rhinoceros, and stem pinniped branches. The pseudogene branch model (M2) analyses with and without the stem placental branch as its own category were tested against each other showing that  $\omega$  of the stem placental branch ( $\omega = 0.6333$ ) is significantly different than all placental branches with functional *ucp1* ( $\omega = 0.1591$ ). Branch categories for the pseudogene analysis included non-mammalian vertebrates, non-placental mammals, placental branches with intact *ucp1* loci, individual transitional branches (M2  $\omega$  values displayed in Fig. 3), and pseudogenic branches. Site and branch-site models were performed with pseudogenes pruned from the dataset. The site model M2a revealed no sites under positive selection and no difference from the null model M1a. The branch site model A was performed to identify sites on the stem placental branch that may have contributed to the gain of NST function. While eight sites were found to have a posterior probability  $>0.95$ , model A was not significantly different from the corresponding null model where  $\omega$  is fixed at 1 for foreground branch sites in the positive selection site category. Site and branch-site model parameters include the proportion of sites ( $p_0, p_1, p_2, p_{2a}$ , and  $p_{2a}$ ) and omega values ( $\omega_0, \omega_1, \omega_2, \omega_{2a}$  and  $\omega_{2b}$ ) for all site classes.

| LRT models                                     | Parameter estimates                                                                                                                                                                                                                                                                                                                                                                                                                                                                                                                                                                                                                                                                                                                                                                         | 2 $\Delta$ l | df | p-value     | Sites (posterior probability $>0.95$ ) |
|------------------------------------------------|---------------------------------------------------------------------------------------------------------------------------------------------------------------------------------------------------------------------------------------------------------------------------------------------------------------------------------------------------------------------------------------------------------------------------------------------------------------------------------------------------------------------------------------------------------------------------------------------------------------------------------------------------------------------------------------------------------------------------------------------------------------------------------------------|--------------|----|-------------|----------------------------------------|
| <b>Branch models</b>                           |                                                                                                                                                                                                                                                                                                                                                                                                                                                                                                                                                                                                                                                                                                                                                                                             |              |    |             |                                        |
| <b>M2 pseudogene vs. M2 camel branch</b>       | <p><b>M2 pseudogene:</b></p> <ul style="list-style-type: none"> <li><math>\omega</math> functional non-mammal branches = 0.0501</li> <li><math>\omega</math> functional non-placental branches = 0.1238</li> <li><math>\omega</math> functional placental branches = 0.1591</li> <li><math>\omega</math> pseudogenic placental branches = 0.9443</li> </ul> <p><b>M2 camel branch:</b></p> <ul style="list-style-type: none"> <li><math>\omega</math> functional non-mammal branches = 0.0501</li> <li><math>\omega</math> functional non-placental branches = 0.1238</li> <li><math>\omega</math> functional placental branches = 0.1585</li> <li><math>\omega</math> pseudogenic placental branches = 0.9438</li> <li><math>\omega</math> <i>C. ferus</i> = 1.0330</li> </ul>             | 4.66614      | 1  | 0.030762959 |                                        |
| <b>M2 pseudogene vs. M2 pygmy hippo branch</b> | <p><b>M2 pseudogene:</b></p> <ul style="list-style-type: none"> <li><math>\omega</math> functional non-mammal branches = 0.0501</li> <li><math>\omega</math> functional non-placental branches = 0.1238</li> <li><math>\omega</math> functional placental branches = 0.1591</li> <li><math>\omega</math> pseudogenic placental branches = 0.9443</li> </ul> <p><b>M2 pygmy hippo branch:</b></p> <ul style="list-style-type: none"> <li><math>\omega</math> functional non-mammal branches = 0.0501</li> <li><math>\omega</math> functional non-placental branches = 0.1238</li> <li><math>\omega</math> functional placental branches = 0.1585</li> <li><math>\omega</math> pseudogenic placental branches = 0.9439</li> <li><math>\omega</math> <i>C. liberiensis</i> = 0.2530</li> </ul> | 1.45469      | 1  | 0.227776571 |                                        |

|                                                    |                                                                                                                                                                                                                                                                                                                                                                                                                                                                                                                                                                                                                                    |             |   |             |
|----------------------------------------------------|------------------------------------------------------------------------------------------------------------------------------------------------------------------------------------------------------------------------------------------------------------------------------------------------------------------------------------------------------------------------------------------------------------------------------------------------------------------------------------------------------------------------------------------------------------------------------------------------------------------------------------|-------------|---|-------------|
| <b>M2 pseudogene vs. M2 stem pinniped branch</b>   | <p><b>M2 pseudogene:</b></p> <ul style="list-style-type: none"> <li>⊖ functional non-mammal branches = 0.0501</li> <li>⊖ functional non-placental branches = 0.1238</li> <li>⊖ functional placental branches = 0.1591</li> <li>⊖ pseudogenetic placental branches = 0.9443</li> </ul> <p><b>M2 pinniped branch:</b></p> <ul style="list-style-type: none"> <li>⊖ functional non-mammal branches = 0.0501</li> <li>⊖ functional non-placental branches = 0.1238</li> <li>⊖ functional placental branches = 0.1580</li> <li>⊖ pseudogenetic placental branches = 0.9439</li> <li>⊖ stem pinniped branch = 0.2866</li> </ul>          | 0.074304175 | 1 | 0.074304175 |
| <b>M2 pseudogene vs. M2 stem rhinoceros branch</b> | <p><b>M2 pseudogene:</b></p> <ul style="list-style-type: none"> <li>⊖ functional non-mammal branches = 0.0501</li> <li>⊖ functional non-placental branches = 0.1238</li> <li>⊖ functional placental branches = 0.1591</li> <li>⊖ pseudogenetic placental branches = 0.9443</li> </ul> <p><b>M2 stem rhinoceros branch:</b></p> <ul style="list-style-type: none"> <li>⊖ functional non-mammal branches = 0.0501</li> <li>⊖ functional non-placental branches = 0.1238</li> <li>⊖ functional placental branches = 0.1585</li> <li>⊖ pseudogenetic placental branches = 0.9438</li> <li>⊖ stem rhinoceros branch = 0.2851</li> </ul> | 1.459344    | 1 | 0.227034526 |
| <b>M2 pseudogene vs. M2 stem placental branch</b>  | <p><b>M2 pseudogene:</b></p> <ul style="list-style-type: none"> <li>⊖ functional non-mammal branches = 0.0501</li> <li>⊖ functional non-placental branches = 0.1238</li> <li>⊖ functional placental branches = 0.1591</li> <li>⊖ pseudogenetic placental branches = 0.9443</li> </ul> <p><b>M2 stem placental branch:</b></p> <ul style="list-style-type: none"> <li>⊖ functional non-mammal branches = 0.0502</li> <li>⊖ functional non-placental branches = 0.1183</li> <li>⊖ functional placental branches = 0.1536</li> <li>⊖ pseudogenetic placental branches = 0.9437</li> <li>⊖ stem placental branch = 0.6333</li> </ul>   | 36.676754   | 1 | 1.39432E-9  |

#### Site models

| M1a vs. M2a | M1a:                                                                                                                                                                                                         | 0 | 2 | 1 | None |
|-------------|--------------------------------------------------------------------------------------------------------------------------------------------------------------------------------------------------------------|---|---|---|------|
|             | <p>p<sub>0</sub> = 0.92037</p> <p>p<sub>1</sub> = 0.07963</p> <p>ω<sub>0</sub> = 0.11041</p> <p>ω<sub>1</sub> = 1.00000</p>                                                                                  |   |   |   |      |
|             | <p><b>M2a:</b></p> <p>p<sub>0</sub> = 0.92037</p> <p>p<sub>1</sub> = 0.05616</p> <p>p<sub>2</sub> = 0.02347</p> <p>ω<sub>0</sub> = 0.11038</p> <p>ω<sub>1</sub> = 1.00000</p> <p>ω<sub>2</sub> = 1.00004</p> |   |   |   |      |

#### Branch-site models

|                                                         |                                                                                                                                                                                                                                                                                                                                                                                                                                                                                                                                                                                                                                                                                                                                                  |         |   |             |                                                                  |
|---------------------------------------------------------|--------------------------------------------------------------------------------------------------------------------------------------------------------------------------------------------------------------------------------------------------------------------------------------------------------------------------------------------------------------------------------------------------------------------------------------------------------------------------------------------------------------------------------------------------------------------------------------------------------------------------------------------------------------------------------------------------------------------------------------------------|---------|---|-------------|------------------------------------------------------------------|
| <b>Model A null vs. Model A - stem placental branch</b> | <p><b>Model A null:</b></p> <ul style="list-style-type: none"> <li>p<sub>0</sub> = 0.47004</li> <li>p<sub>1</sub> = 0.04251</li> <li>p<sub>2a</sub> = 0.44702</li> <li>p<sub>2b</sub> = 0.04043</li> <li>ω<sub>0</sub> &amp; ω<sub>2a</sub> background = 0.10531</li> <li>ω<sub>1</sub> &amp; ω<sub>2b</sub> background = 1.00000</li> <li>ω<sub>0</sub> foreground = 0.10531</li> <li>ω<sub>1</sub>, ω<sub>2a</sub> &amp; ω<sub>2b</sub> foreground = 1.00000</li> </ul> <p><b>Model A:</b></p> <ul style="list-style-type: none"> <li>p<sub>0</sub> = 0.54398</li> <li>p<sub>1</sub> = 0.04910</li> <li>p<sub>2a</sub> = 0.37323</li> <li>p<sub>2b</sub> = 0.03369</li> <li>ω<sub>0</sub> &amp; ω<sub>2a</sub> background = 0.10532</li> </ul> | 0.63447 | 1 | 0.425720414 | 15L,<br>22S,<br>76K,<br>124L,<br>153I,<br>170T,<br>224I,<br>261M |
|---------------------------------------------------------|--------------------------------------------------------------------------------------------------------------------------------------------------------------------------------------------------------------------------------------------------------------------------------------------------------------------------------------------------------------------------------------------------------------------------------------------------------------------------------------------------------------------------------------------------------------------------------------------------------------------------------------------------------------------------------------------------------------------------------------------------|---------|---|-------------|------------------------------------------------------------------|

$\omega_1$  &  $\omega_{2b}$  background = 1.00000  
 $\omega_0$  foreground = 0.10532  
 $\omega_1$  foreground = 1.00000  
 $\omega_{2a}$  &  $\omega_{2b}$  foreground = 1.40522



**Table S3. Calculated *ucp1* inactivation dates (millions of years ago; Ma) within the placental mammal lineage.** Inactivation date ranges were calculated using the two sets of formulas specified by Meredith *et al.* (26) with branch model CODEML analyses using species divergences and branch lengths arising from our 51 kb maximum likelihood species timetree analysis (data file S1). The first dating method assumes the rate of “synonymous substitution are neutral and equal on functional and pseudogene branches” while the second assumes “the rate synonymous substitution on functional branches is non-neutral and 70% of the rate of synonymous substitution on pseudogene branches”. Inactivation date calculations utilized  $\omega$  values for placental branches with functional *ucp1* ( $\omega=0.1591$ ), transitional branches ( $\omega$  values displayed in Fig. 3), and pseudogenetic branches ( $\omega=0.9435$ ). As  $\omega$  values calculated for *Dasyopus novemcinctus*, *Manis pentadactyla*, and the stem cetacean branch ( $\omega=1.0567$ , 0.9849, and 0.9872, respectively) exceeded the mean value of pseudogenized branches, we placed their inactivation dates at the base of each clade. Conversely, the  $\omega$  value (0.0805) for the stem Pilosa branch was below that for functional branches; shared inactivating mutations in three-toed sloth (*Bradypus*), two-toed sloth (*Choleopus*), and silky anteater (*Cyclopes didactylus*), however, indicate *ucp1* was pseudogenized prior to their radiation ~55.03 Ma. Note that since only remnants of *ucp1* (exon 6) were identified from representative Pilosa, it is possible that *ucp1* pseudogenization preceded its divergence from Cingulata.

| Transitional branch          | Inactivation date (Ma) |
|------------------------------|------------------------|
| <i>Dasyopus novemcinctus</i> | 65.55                  |
| Pilosa                       | >55.03                 |
| <i>Procavia capensis</i>     | 33.5–27.3              |
| Proboscidea                  | 42.9–37.5              |
| Sirenia                      | 46.0–44.8              |
| Suidae ( <i>Sus spp.</i> )   | 41.2–36.4              |
| Cetacea                      | 52.75                  |
| Equus                        | 25.1–20.7              |
| <i>Manis pentadactyla</i>    | 74.69                  |

**Table S4. Results of binary state speciation and extinction (BiSSE) models with and without constraints on the diversification rate for five trees from Faurby and Svenning (59).**

| Tree # | Model                              | Constraints                           | lambda0   | lambda1   | mu0       | mu1       | q01       | q10 | parameters | Ln Lik | AIC   | p value  |
|--------|------------------------------------|---------------------------------------|-----------|-----------|-----------|-----------|-----------|-----|------------|--------|-------|----------|
| 1      | No reversal                        | q10 = 0                               | 0.2990537 | 0.2118425 | 0.2301557 | 0.1818380 | 0.0001916 | 0   | 5          | -14264 | 28539 | 2.32E-05 |
| 1      | No reversal, equal diversification | lambda0 = lambda1, mu0 = mu1, q10 = 0 | 0.2985928 | 0.2985928 | 0.2333964 | 0.2333964 | 0.0001907 | 0   | 3          | -14275 | 28556 |          |
| 2      | No reversal                        | q10 = 0                               | 0.2979023 | 0.1557338 | 0.2310627 | 0.1124779 | 0.0001479 | 0   | 5          | -14334 | 28679 | 1.31E-07 |
| 2      | No reversal, equal diversification | lambda0 = lambda1, mu0 = mu1, q10 = 0 | 0.292754  | 0.292754  | 0.228024  | 0.228024  | 0.0001891 | 0   | 3          | -14350 | 28707 |          |
| 3      | No reversal                        | q10 = 0                               | 0.2724713 | 0.1950414 | 0.1966417 | 0.1611570 | 0.0001922 | 0   | 5          | -14467 | 28944 | 1.27E-05 |
| 3      | No reversal, equal diversification | lambda0 = lambda1, mu0 = mu1, q10 = 0 | 0.2714773 | 0.2714773 | 0.1993568 | 0.1993568 | 0.0001890 | 0   | 3          | -14478 | 28963 |          |
| 4      | No reversal                        | q10 = 0                               | 0.3102003 | 0.1427713 | 0.2429003 | 0.0985164 | 0.0001410 | 0   | 5          | -14178 | 28366 | 9.45E-10 |
| 4      | No reversal, equal diversification | lambda0 = lambda1, mu0 = mu1, q10 = 0 | 0.3041617 | 0.3041617 | 0.2393333 | 0.2393333 | 0.0001951 | 0   | 3          | -14199 | 28404 |          |
| 5      | No reversal                        | q10 = 0                               | 0.2789428 | 0.1652951 | 0.2083545 | 0.1242601 | 0.0001596 | 0   | 5          | -14518 | 29047 | 3.37E-06 |
| 5      | No reversal, equal diversification | lambda0 = lambda1, mu0 = mu1, q10 = 0 | 0.275516y | 0.2755167 | 0.2074114 | 0.2074114 | 0.0001844 | 0   | 3          | -14531 | 29068 |          |

**Table S5. Binary state speciation-extinction (BiSSE) results for neutral character simulations.** Neutral characters were simulated on the same five trees (5138 taxa) as in table S4. In each case, a model with no reversal ( $q_{10} = 0$ ) and no constraints on diversification rates was compared to a model with no reversal ( $q_{10} = 0$ ), equal speciation rates ( $\lambda_0 = \lambda_1$ ), and equal extinction rates ( $\mu_0 = \mu_1$ ). Significance levels are indicated (\* =  $p < 0.5$ ; \*\* =  $p < 0.01$ ; \*\*\* =  $p < 0.0001$ ).

| Tree # | Ln Lik | AIC   | ChiSq   | p value   | Significance level |
|--------|--------|-------|---------|-----------|--------------------|
| 1      | -14287 | 28580 | 8.3649  | 0.01526   | *                  |
| 1      | -14290 | 28585 | 17.882  | 0.0001309 | ***                |
| 1      | -14283 | 28571 | 25.832  | 2.46E-06  | ***                |
| 1      | -14268 | 28541 | 1.6061  | 0.448     |                    |
| 1      | -14297 | 28600 | 5.7015  | 0.0578    |                    |
| 1      | -14279 | 28564 | 2.7851  | 0.2484    |                    |
| 1      | -14268 | 28543 | 6.1693  | 0.04575   | *                  |
| 1      | -14279 | 28564 | 0.68013 | 0.7117    |                    |
| 1      | -14267 | 28539 | 1.6509  | 0.438     |                    |
| 1      | -14288 | 28582 | 2.1826  | 0.3358    |                    |
| 1      | -14262 | 28531 | 1.4547  | 0.4832    |                    |
| 1      | -14311 | 28628 | 0.24268 | 0.8857    |                    |
| 1      | -14268 | 28543 | 1.2025  | 0.5481    |                    |
| 1      | -14291 | 28588 | 15.569  | 0.0004162 | ***                |
| 1      | -14254 | 28514 | 4.3205  | 0.1153    |                    |
| 1      | -14268 | 28542 | 8.56    | 0.01384   | *                  |
| 1      | -14284 | 28574 | 5.711   | 0.05753   |                    |
| 1      | -14304 | 28615 | 4.7037  | 0.0952    |                    |
| 1      | -14276 | 28558 | 15.226  | 0.0004939 | ***                |
| 1      | -14301 | 28608 | 2.1298  | 0.3448    |                    |
| 2      | -14321 | 28648 | 2.2439  | 0.3256    |                    |
| 2      | -14352 | 28709 | 12.725  | 0.001725  | **                 |
| 2      | -14368 | 28742 | 1.9207  | 0.3828    |                    |
| 2      | -14360 | 28725 | 0.30942 | 0.8567    |                    |
| 2      | -14360 | 28726 | 2.7076  | 0.2583    |                    |
| 2      | -14342 | 28690 | 7.9521  | 0.01876   | *                  |
| 2      | -14332 | 28669 | 3.5106  | 0.1729    |                    |
| 2      | -14321 | 28648 | 2.2393  | 0.3264    |                    |
| 2      | -14356 | 28717 | 2.5266  | 0.2827    |                    |
| 2      | -14340 | 28686 | 1.5311  | 0.4651    |                    |
| 2      | -14340 | 28687 | 3.4521  | 0.178     |                    |
| 2      | -14347 | 28700 | 11.566  | 0.00308   | **                 |
| 2      | -14339 | 28685 | 7.5964  | 0.02241   | *                  |
| 2      | -14355 | 28715 | 12.958  | 0.001535  | **                 |
| 2      | -14348 | 28703 | 13.494  | 0.001174  | **                 |

|   |        |       |         |           |     |
|---|--------|-------|---------|-----------|-----|
| 2 | -14354 | 28714 | 3.9504  | 0.1387    |     |
| 2 | -14349 | 28704 | 19.476  | 5.90E-05  | *** |
| 2 | -14360 | 28727 | 2.1532  | 0.3408    |     |
| 2 | -14348 | 28703 | 15.847  | 0.0003622 | *** |
| 2 | -14353 | 28713 | 0.42811 | 0.8073    |     |
| 3 | -14447 | 28899 | 24.473  | 4.85E-06  | *** |
| 3 | -14509 | 29024 | 4.2386  | 0.1201    |     |
| 3 | -14525 | 29056 | 16.217  | 0.0003009 | *** |
| 3 | -14488 | 28982 | 7.0465  | 0.0295    | *   |
| 3 | -14514 | 29034 | 7.2817  | 0.02623   | *   |
| 3 | -14494 | 28995 | 0.22603 | 0.8931    |     |
| 3 | -14470 | 28947 | 1.5699  | 0.4561    |     |
| 3 | -14498 | 29001 | 3.105   | 0.2117    |     |
| 3 | -14481 | 28967 | 7.1922  | 0.02743   | *   |
| 3 | -14472 | 28950 | 3.9134  | 0.1413    |     |
| 3 | -14477 | 28961 | 2.3794  | 0.3043    |     |
| 3 | -14472 | 28950 | 0.68295 | 0.7107    |     |
| 3 | -14455 | 28916 | 6.5718  | 0.03741   | *   |
| 3 | -14500 | 29007 | 17.326  | 0.0001729 | *** |
| 3 | -14477 | 28960 | 14.934  | 0.0005715 | *** |
| 3 | -14471 | 28947 | 13.084  | 0.001441  | **  |
| 3 | -14504 | 29014 | 3.9079  | 0.1417    |     |
| 3 | -14523 | 29051 | 7.2379  | 0.02681   | *   |
| 3 | -14476 | 28958 | 23.591  | 7.54E-06  | *** |
| 3 | -14501 | 29008 | 1.8208  | 0.4024    |     |
| 4 | -14178 | 28362 | 0.90767 | 0.6352    |     |
| 4 | -14220 | 28446 | 25.795  | 2.51E-06  | *** |
| 4 | -14212 | 28431 | 7.0962  | 0.02878   | *   |
| 4 | -14214 | 28433 | 18.623  | 9.04E-05  | *** |
| 4 | -14208 | 28423 | 0.68958 | 0.7084    |     |
| 4 | -14210 | 28426 | 22.513  | 1.29E-05  | *** |
| 4 | -14188 | 28382 | 1.5229  | 0.467     |     |
| 4 | -14215 | 28436 | 6.0754  | 0.04794   | *   |
| 4 | -14202 | 28410 | 4.4862  | 0.1061    |     |
| 4 | -14187 | 28380 | 1.037   | 0.5954    |     |
| 4 | -14200 | 28406 | 26.321  | 1.93E-06  | *** |
| 4 | -14187 | 28380 | 2.1832  | 0.3357    |     |
| 4 | -14176 | 28358 | 2.4273  | 0.2971    |     |
| 4 | -14187 | 28380 | 6.1279  | 0.0467    | *   |
| 4 | -14191 | 28388 | 8.889   | 0.01174   | *   |
| 4 | -14199 | 28403 | 9.5794  | 0.008315  | **  |
| 4 | -14188 | 28382 | 13.933  | 0.0009428 | *** |
| 4 | -14213 | 28432 | 20.863  | 2.95E-05  | *** |

|   |        |       |         |          |     |
|---|--------|-------|---------|----------|-----|
| 4 | -14194 | 28393 | 4.8134  | 0.09011  |     |
| 4 | -14200 | 28405 | 5.7027  | 0.05777  |     |
| 5 | -14527 | 29060 | 1.4141  | 0.4931   |     |
| 5 | -14546 | 29098 | 3.5835  | 0.1667   |     |
| 5 | -14536 | 29078 | 5.8842  | 0.05275  |     |
| 5 | -14549 | 29105 | 2.5866  | 0.2744   |     |
| 5 | -14525 | 29057 | 1.59    | 0.4516   |     |
| 5 | -14555 | 29116 | 107.64  | <2.2e-16 | *** |
| 5 | -14550 | 29106 | 0.29186 | 0.8642   |     |
| 5 | -14526 | 29058 | 4.8953  | 0.0865   |     |
| 5 | -14557 | 29119 | 2.5245  | 0.283    |     |
| 5 | -14530 | 29066 | 1.7002  | 0.4274   |     |
| 5 | -14546 | 29098 | 8.3536  | 0.01535  | *   |
| 5 | -14552 | 29109 | 4.0583  | 0.1314   |     |
| 5 | -14545 | 29096 | 4.2978  | 0.1166   |     |
| 5 | -14546 | 29098 | 3.0219  | 0.2207   |     |
| 5 | -14534 | 29074 | 10.38   | 0.005572 | **  |
| 5 | -14510 | 29025 | 9.9686  | 0.006845 | **  |
| 5 | -14570 | 29147 | 32.984  | 6.88E-08 | *** |
| 5 | -14562 | 29129 | 6.778   | 0.03374  | *   |
| 5 | -14545 | 29096 | 4.8771  | 0.08729  |     |
| 5 | -14526 | 29058 | 0.23807 | 0.8878   |     |

**Table S6. Deleterious mutations found in *ucp2* and *ucp3* sequences of placental mammal taxa.** Base numbers correspond to position in multiple species alignments (data files S4 and S5). Note that the coding region of several *ucp2* and *ucp3* sequences in GenBank (*ucp2*: Tammar wallaby [ABQO020850797.1], orangutan [ABGA01223176.1, ABGA01223175.1], and thirteen-lined ground squirrel [AAQQ01149310.1]; *ucp3*: Northern white-cheeked gibbon [ADFV01111578.1]) showed signs of disruption (indels), though these were not present in the NCBI sequence read archive and thus likely represent assembly errors.

| <b>Gene</b> | <b>Species name</b>         | <b>Base number</b>           | <b>Inactivating mutation</b> |               |
|-------------|-----------------------------|------------------------------|------------------------------|---------------|
| <i>ucp2</i> | <i>Dasypus novemcinctus</i> | 1                            | Mutated initiation codon     |               |
|             |                             | 96                           | 1 bp deletion                |               |
|             |                             | 348-349                      | 2 bp deletion                |               |
|             |                             | 396-397                      | 2 bp deletion                |               |
|             |                             | 463                          | 1 bp deletion                |               |
|             |                             | 646-648                      | Nonsense mutation            |               |
|             |                             | 653-654                      | 2 bp deletion                |               |
|             |                             | 673                          | 1 bp deletion                |               |
|             |                             | 889                          | 1 bp deletion                |               |
|             |                             | 906                          | 1 bp deletion                |               |
|             |                             | 930                          | 1 bp deletion                |               |
| <i>ucp3</i> | <i>Dasypus novemcinctus</i> | 752                          | 1 bp deletion                |               |
|             |                             | <i>Oryctolagus cuniculus</i> | 54                           | 1 bp deletion |
|             |                             |                              | 78                           | 1 bp deletion |

**Table S7. Specimen data and sources of tissue samples used for PCR amplification and DNA hybridization capture.**

| Common name           | Scientific name                 | Sample                                                                                                                                                                                                                                                                                                                                                                     | Provided by                                                                                                                               |
|-----------------------|---------------------------------|----------------------------------------------------------------------------------------------------------------------------------------------------------------------------------------------------------------------------------------------------------------------------------------------------------------------------------------------------------------------------|-------------------------------------------------------------------------------------------------------------------------------------------|
| <b>Xenarthra</b>      |                                 |                                                                                                                                                                                                                                                                                                                                                                            |                                                                                                                                           |
| Brown-throated sloth  | <i>Bradypus variegatus</i>      | Genomic DNA, previously extracted                                                                                                                                                                                                                                                                                                                                          | M. Springer, University of California, Riverside                                                                                          |
| Silky anteater        | <i>Cyclopes didactylus</i>      | Genomic DNA, previously extracted (49)                                                                                                                                                                                                                                                                                                                                     | M. Springer, University of California, Riverside                                                                                          |
| <b>Paenungulata</b>   |                                 |                                                                                                                                                                                                                                                                                                                                                                            |                                                                                                                                           |
| Dugong                | <i>Dugong dugon</i>             | Two genomic DNA samples, Female, Mabuiag Island, Torres Straits, Australia, previously extracted (72);<br>Sample codes: MD33 and MD118                                                                                                                                                                                                                                     | D. McDonald, James Cook University, Australia                                                                                             |
| Steller's sea cow     | <i>Hydrodamalis gigas</i>       | Three bone samples housed in the Zoological Institute of the Russian Academy of Sciences (St. Petersburg, Russian Federation), previously extracted (67, 73)<br>ZI 6852: Mandible collected from Bering Island, Komandorskii in 1884<br>ZI6853: Humerus, no collection information<br>ZI 17170: Scapula, no collection information                                         | R. MacPhee, American Museum of Natural History                                                                                            |
| Asian elephant        | <i>Elephas maximus</i>          | Genomic DNA, Male, previously extracted (72)                                                                                                                                                                                                                                                                                                                               | W. Korver, Bowmanville Zoo, Ontario, Canada                                                                                               |
| African elephant      | <i>Loxodonta africana</i>       | Genomic DNA, Female, previously extracted (72)                                                                                                                                                                                                                                                                                                                             | W. Korver, Bowmanville Zoo, Ontario, Canada                                                                                               |
| <b>Laurasiatheria</b> |                                 |                                                                                                                                                                                                                                                                                                                                                                            |                                                                                                                                           |
| Pygmy hippopotamus    | <i>Choeropsis liberiensis</i>   | Genomic DNA, previously extracted (82)                                                                                                                                                                                                                                                                                                                                     | New York Zoological Society                                                                                                               |
| Bowhead whale         | <i>Balaena mysticetus</i>       | Genomic DNA                                                                                                                                                                                                                                                                                                                                                                | SWFSC                                                                                                                                     |
| Beluga whale          | <i>Delphinapterus leucas</i>    | Genomic DNA, previously extracted (82)                                                                                                                                                                                                                                                                                                                                     | New York Zoological Society                                                                                                               |
| Grant's zebra         | <i>Equus quagga boehmi</i>      | Skeletal muscle from stillborn calf                                                                                                                                                                                                                                                                                                                                        | S. Petersen, Assiniboine Park Zoo, Manitoba, Canada                                                                                       |
| Malayan tapir         | <i>Tapirus indicus</i>          | Blood                                                                                                                                                                                                                                                                                                                                                                      | M. Bertelsen, Copenhagen Zoo, Frederiksberg, Denmark<br>T. Gilbert and E. Willerslev, University of Copenhagen                            |
| Woolly rhinoceros     | <i>Coelodonta antiquitatis</i>  | Permafrost preserved tooth and bone samples housed at the Centre for GeoGenetics at the Natural History museum of Denmark (Copenhagen, Denmark)<br>CGG_1_000024: Tooth, Bol'shoi Lyakhovsky Island, Novaya Sibir' Island, Siberia, Russia<br>CGG_1_000029: Bone, Badyarikha, Indigirka Lowland, Russia<br>CGG_1_000031: Bone, Khetachan Creek Mine, Kolyma Lowland, Russia | T. Gilbert and E. Willerslev, University of Copenhagen                                                                                    |
| Black rhinoceros      | <i>Diceros bicornis</i>         | Genomic DNA, previously extracted                                                                                                                                                                                                                                                                                                                                          | CRES                                                                                                                                      |
| Sumatran rhinoceros   | <i>Dicerorhinus sumatrensis</i> | Blood excised from a leech that fed on a Sumatran rhinoceros                                                                                                                                                                                                                                                                                                               | R. Havmøller, T. Gilbert, and E. Willerslev, University of Copenhagen<br>Leibniz-Institute for Zoo and Wildlife Research, Berlin, Germany |
| Indian rhinoceros     | <i>Rhinoceros unicornis</i>     | Genomic DNA, previously extracted                                                                                                                                                                                                                                                                                                                                          | CRES                                                                                                                                      |

**Table S8. Fossil constraints used in timetree analysis.<sup>A</sup>**

| Constrained Clade                                            | Min Age | Max Age | Basis for Max Age | Oldest Fossil                                                               | Comments/References                                                                                                                                                                                                                                                                                                                                                                                                                                                                                                                                                                                                                                                                                                                                                                                                                                                                                                                                                                                                                                                                                                                                                                                                                                                                                                                                                     |
|--------------------------------------------------------------|---------|---------|-------------------|-----------------------------------------------------------------------------|-------------------------------------------------------------------------------------------------------------------------------------------------------------------------------------------------------------------------------------------------------------------------------------------------------------------------------------------------------------------------------------------------------------------------------------------------------------------------------------------------------------------------------------------------------------------------------------------------------------------------------------------------------------------------------------------------------------------------------------------------------------------------------------------------------------------------------------------------------------------------------------------------------------------------------------------------------------------------------------------------------------------------------------------------------------------------------------------------------------------------------------------------------------------------------------------------------------------------------------------------------------------------------------------------------------------------------------------------------------------------|
| 1. Metatheria                                                | 65.18   | 83.8    | SB                | <i>Peradectes</i> (Puercan);<br><i>Minoperadectes</i><br>(Early Wasatchian) | Horovitz <i>et al.</i> (84) reported Puercan <i>Peradectes</i> (age = 65.18 Ma) as the oldest crown metatherian and recovered this taxon as a stem didelphimorphian. Benton <i>et al.</i> (81) cited Horovitz <i>et al.</i> (84) in support of a younger age for Metatheria but failed to describe their rationale for excluding <i>Peradectes</i> from crown Metatheria.                                                                                                                                                                                                                                                                                                                                                                                                                                                                                                                                                                                                                                                                                                                                                                                                                                                                                                                                                                                               |
| 2. Xenarthra                                                 | 47.8    | 66.0    | PB                | <i>Riostegotherium</i>                                                      | <i>Riostegotherium</i> is from the Itaboraian (85). The Itaboraian was originally considered equivalent to the Selandian stage (86), but Woodburne <i>et al.</i> (87) suggested an early Eocene age (minimum = 47.8 Ma). The first outgroup to Xenarthra is Afrotheria, Boreoeutheria, or Epitheria, all of which have early Paleocene representatives.                                                                                                                                                                                                                                                                                                                                                                                                                                                                                                                                                                                                                                                                                                                                                                                                                                                                                                                                                                                                                 |
| 3. Proboscidea<br>(= <i>Loxodonta</i> to<br><i>Elephas</i> ) | 6.8     | 11.62   | SB                | <i>Loxodonta</i>                                                            | Vignaud <i>et al.</i> (88) reported <i>Loxodonta</i> in their faunal list for a hominid locality in Chad. Vignaud <i>et al.</i> 's (88) locality was radiometrically dated by Lebatard <i>et al.</i> (89) to have an age between 6.8 and 7.2 Ma. The oldest <i>Elephas</i> lineage fossils have a minimum age of 5.332 Ma (90, 91).                                                                                                                                                                                                                                                                                                                                                                                                                                                                                                                                                                                                                                                                                                                                                                                                                                                                                                                                                                                                                                     |
| 4. <i>Dugong</i> to<br><i>Hydrodamalis</i>                   | 28.1    | 38.0    | SB                | <i>Crenatosiren</i>                                                         | The minimum age is based on the inclusion of early Oligocene taxa ( <i>e.g.</i> , <i>Crenatosiren olseni</i> ) in crown Dugongidae (67, 92).                                                                                                                                                                                                                                                                                                                                                                                                                                                                                                                                                                                                                                                                                                                                                                                                                                                                                                                                                                                                                                                                                                                                                                                                                            |
| 5. Sirenia ( <i>Dugong</i><br>to <i>Trichechus</i> )         | 41.3    | 59.2    | SB                | <i>Eotheroides</i>                                                          | The minimum age is based on the inclusion of Lutetian age <i>Eotheroides aegyptiacum</i> in crown Sirenia (67, 92-94).                                                                                                                                                                                                                                                                                                                                                                                                                                                                                                                                                                                                                                                                                                                                                                                                                                                                                                                                                                                                                                                                                                                                                                                                                                                  |
| 6. Tethytheria                                               | 59.2    | 72.3    | SB                | <i>Eritherium</i>                                                           | <i>Eritherium</i> is a stem proboscidean and is no younger than the late Selandian (95), which has a minimum age of 59.1 Ma.                                                                                                                                                                                                                                                                                                                                                                                                                                                                                                                                                                                                                                                                                                                                                                                                                                                                                                                                                                                                                                                                                                                                                                                                                                            |
| 7. Paenungulata                                              | 59.2    | 72.3    | SB                | <i>Eritherium</i>                                                           | <i>Eritherium</i> is a stem proboscidean and is no younger than the late Selandian (95), which has a minimum age of 59.1 Ma.                                                                                                                                                                                                                                                                                                                                                                                                                                                                                                                                                                                                                                                                                                                                                                                                                                                                                                                                                                                                                                                                                                                                                                                                                                            |
| 8. Chiroptera                                                | 47.8    | 66.0    |                   | <i>Dizzya</i>                                                               | <i>Dizzya</i> (Phyllitidae, Vespertilionoidea) is among the oldest crown chiropterans and is from the Ypresian (96). We used the top of the Ypresian as a minimum age for Yangochiroptera. Phillips (97) suggested a maximum age of 58.9 Ma for Chiroptera. The oldest bats (earliest Eocene, ~55 Ma) were already highly specialized fliers with fully developed wings (98, 99). Bats are one of the least common groups of mammals in the fossil record (96, 98, 100, 101), and in our view it is unnecessarily restrictive to enforce a maximum of 58.9 Ma on crown Chiroptera. Furthermore, molecular studies have rearranged the evolutionary tree for bats and recovered numerous higher-level clades that were previously unrecognized based on morphological data (100, 102, 103). The relationships of several early Eocene fossils ( <i>e.g.</i> , <i>Palaeochiropteryx</i> , <i>Archaeonycteris</i> , <i>Hassianonycteris</i> ), in turn, lack robust support, and their inclusion or exclusion from crown Chiroptera is sensitive to the enforcement of molecular scaffolds (99, 100, 104). Phylogenetic uncertainties, convergent evolution, and a depauperate fossil record conspire together to limit our understanding of the early evolutionary history of bats and caution against employing a maximum that is younger than the KPg boundary (66 Ma). |
| 9. Megadermatidae<br>to Rhinolophidae+<br>Hipposideridae     | 38.0    | 56      | SB                | <i>Hipposideros</i>                                                         | <i>Hipposideros</i> and <i>Rhinolophus</i> are both known from the Eocene of Europe (105). Eiting and Gunnell (96) indicate that <i>Hipposideros</i> first occurs in the Bartonian whereas <i>Rhinolophus</i> first occurs in the Priabonian.                                                                                                                                                                                                                                                                                                                                                                                                                                                                                                                                                                                                                                                                                                                                                                                                                                                                                                                                                                                                                                                                                                                           |
| 10. Caniformia<br>(=Canidae to<br>Arctoidea)                 | 38.0    | 56      | SB                | <i>Hesperocyon<br/>gregarius</i>                                            | <i>Hesperocyon gregarius</i> fossils are known from the Duchesnean (~Bartonian) land mammal age in the middle Eocene (106). <i>H. gregarius</i> is a stem canid (107).                                                                                                                                                                                                                                                                                                                                                                                                                                                                                                                                                                                                                                                                                                                                                                                                                                                                                                                                                                                                                                                                                                                                                                                                  |
| 11. Ursidae to other<br>Arctoidea                            | 28.1    | 41.3    | SB                | <i>Cephalogale</i>                                                          | <i>Cephalogale</i> belongs to the ursid subfamily Hemicyoninae and has emerged as a stem ursid in phylogenetic analyses (108); also see                                                                                                                                                                                                                                                                                                                                                                                                                                                                                                                                                                                                                                                                                                                                                                                                                                                                                                                                                                                                                                                                                                                                                                                                                                 |



|                                              |       |      |          |                                          |                                                                                                                                                                                                                                                                                                                                                                                                                                                                                                                                                                                                                                                                                                                |
|----------------------------------------------|-------|------|----------|------------------------------------------|----------------------------------------------------------------------------------------------------------------------------------------------------------------------------------------------------------------------------------------------------------------------------------------------------------------------------------------------------------------------------------------------------------------------------------------------------------------------------------------------------------------------------------------------------------------------------------------------------------------------------------------------------------------------------------------------------------------|
|                                              |       |      |          |                                          | Wang <i>et al.</i> (109). <i>Cephalogale</i> is known from the early Oligocene (110). We used the top of the early Oligocene as the minimum for Urside to other arctoids.                                                                                                                                                                                                                                                                                                                                                                                                                                                                                                                                      |
| 12. Musteloidea to Pinnipedia                | 23.03 | 38.0 | SB/PB/PU | <i>Promartes</i> ,<br><i>Enaliarctos</i> | <i>Mustelavus priscus</i> is first known from the latest Eocene (111). <i>M. priscus</i> is either a stem musteloid (109, 111, 112), and the oldest representative of the crown taxon that includes musteloids and pinnipeds, or a deeper lineage within Caniformes (113). Tomiya's analysis is at odds with molecular studies and recovered <i>Ursus</i> inside of crown Musteloidea. Nevertheless, given the uncertainty regarding <i>Mustelavus</i> based on Tomiya (113), we implemented a minimum of 23.03 Ma for the musteloid-pinniped split based on the oldest musteloid ( <i>Promartes</i> ) (108, 111) and oldest pinniped ( <i>Enaliarctos</i> ) (114), both of which are from the late Oligocene. |
| 13. Pinnipedia                               | 20.43 | 33.9 | SB       | <i>Desmatophoca brachycephala</i>        | <i>Desmatophoca brachycephala</i> is Aquitanian (20.43-23.03 Ma) in age (115). The oldest stem pinnipeds are Chattian (e.g., <i>E. tedfordi</i> ). SB yields an older maximum than PB.                                                                                                                                                                                                                                                                                                                                                                                                                                                                                                                         |
| 14. Carnivora                                | 38.0  | 66.0 | PU       | <i>Hesperocyon gregarius</i>             | <i>Hesperocyon gregarius</i> is a basal canid in constrained (116) and unconstrained (107, 116) analyses. Viverravids from the early Paleocene are probably stem carnivorans (116), but phylogenetic uncertainty allows for the possibility that they are stem feliforms (117-119). Benton <i>et al.</i> (81) also suggested a maximum of 66 Ma for Carnivora.                                                                                                                                                                                                                                                                                                                                                 |
| 15. Perissodactyla                           | 55.5  | 61.6 | SB       | <i>Hyracotherium</i>                     | <i>Hyracotherium</i> first appears in Wa-0 at the beginning of the Eocene (120) and is the oldest crown Perissodactyla.                                                                                                                                                                                                                                                                                                                                                                                                                                                                                                                                                                                        |
| 16. Erinaceidae to Soricidae                 | 61.6  | 83.8 | SB       | <i>Adunator</i>                          | <i>Adunator</i> is the oldest erinaceomorph (121) and is known from the Torrejonian (contained within Danian). The minimum age is 61.6 Ma and the maximum is the base of the Campanian (83.6 +/-0.2 = 83.8 Ma) based on SB.                                                                                                                                                                                                                                                                                                                                                                                                                                                                                    |
| 17. Cetartiodactyla                          | 52.5  | 66.0 | PB/PU    | <i>Himalayacetus</i>                     | <i>Himalayacetus</i> is from shallow benthic zone SB8, which has a minimum age of 52.5 Ma within the Ypresian (56, 121). Mesonychids are a possible sister taxon to Cetartiodactyla, or may even be nested with Cetartiodactyla as the sister to Cetacea (122). The oldest mesonychids are early Paleocene in age and establish a maximum age for Cetartiodactyla.                                                                                                                                                                                                                                                                                                                                             |
| 18. Whippomorpha                             | 52.5  | 61.6 | SB       | <i>Himalayacetus</i>                     | <i>Himalayacetus</i> is from shallow benthic zone SB8, which has a minimum age of 52.5 Ma within the Ypresian (56, 121).                                                                                                                                                                                                                                                                                                                                                                                                                                                                                                                                                                                       |
| 19. Cetacea                                  | 34.0  | 47.8 | SB       | <i>Llanocetus denticrenatus</i>          | <i>Llanocetus</i> is known from the La Meseta Formation of Seymour Island, Antarctica, and is latest Eocene in age (56, 123). <i>Llanocetus</i> is the oldest crown cetacean and a primitive stem mysticete. The oldest odontocetes are stem odontocetes from the Rupelian (early Oligocene) or more precisely from the late early Oligocene (56), although there are also older forms that have not been described. Uhen (56) doesn't provide ages.                                                                                                                                                                                                                                                           |
| 20. Mysticeti                                | 20.43 | 33.9 | SB       | <i>Morenocetus parvus</i>                | <i>Morenocetus parvus</i> is the oldest described species belonging to crown-group Mysticeti, and is from the Aquitanian (minimum age = 20.43 Ma) in the early Miocene of Patagonia (124). There is also an unnamed balaenid (~28 Ma) from the late Oligocene of New Zealand (Kokoamu Greensand) (125), but the phylogenetic position of this taxon is unclear and awaits phylogenetic analysis (J. Geisler, communication to J. Gatesy).                                                                                                                                                                                                                                                                      |
| 21. Bovinae to Antilopinae                   | 16    | 28.1 | SB       | <i>Pseudoeotragus</i>                    | <i>Pseudoeotragus</i> is a stem antelope and is known from the Burdigalian (81).                                                                                                                                                                                                                                                                                                                                                                                                                                                                                                                                                                                                                               |
| 22. Haplorrhini (=Tarsiidae to Anthropeidea) | 38.0  | 59.2 | PU       | Numerous eosimiids                       | <i>Altitalasius</i> is known from the late Paleocene and is a stem anthropoid in recent cladistic analyses (126, 127), although not in Bloch <i>et al.</i> (128). <i>Anthrasimias</i> (54-55 Ma, Sparnacian) (126, 129) is another putative stem anthropoid, although its anthropoid status has been questioned (127). <i>Algeripithecus</i> is younger (> 45 Ma) and has been referred to Anthropeidea (130). However, recent discoveries of more complete specimens of <i>Algeripithecus</i> suggest that it is not anthropoid (131). Instead, it may belong to the Azibiidae, which are argued to be adapiforms, early euprimates, plesiadapiforms (possible stem                                           |

|                                   |        |      |       |                                                                                                        |                                                                                                                                                                                                                                                                                                                                                                                                                                                                                                                                                                                                                                                                                                                                                                                                                                                                                                                                                                                                                                                                                                        |
|-----------------------------------|--------|------|-------|--------------------------------------------------------------------------------------------------------|--------------------------------------------------------------------------------------------------------------------------------------------------------------------------------------------------------------------------------------------------------------------------------------------------------------------------------------------------------------------------------------------------------------------------------------------------------------------------------------------------------------------------------------------------------------------------------------------------------------------------------------------------------------------------------------------------------------------------------------------------------------------------------------------------------------------------------------------------------------------------------------------------------------------------------------------------------------------------------------------------------------------------------------------------------------------------------------------------------|
|                                   |        |      |       |                                                                                                        | primates), or even nonprimates (131). As many as 11 species and six genera of Asian eosimiids are known from the middle Eocene of Asia (131). The oldest tarsiid is <i>Tarsius eoceanus</i> (132, 133) from the middle Eocene of China (minimum age = 38.0 Ma). We used the top of the middle Eocene as a minimum for crown Haplorhini based on the occurrence of numerous eosimiids from the middle Eocene (131). The maximum age allows for the possibility that the late Paleocene <i>Altiatlasius</i> from Morocco is a stem anthropoid (131).                                                                                                                                                                                                                                                                                                                                                                                                                                                                                                                                                     |
| 23. Anthropoidea                  | 28.1   | 56.0 | PU    | <i>Aegyptopithecus</i>                                                                                 | <i>Aegyptopithecus</i> (early Oligocene~Rupelian) is a stem catarrhine in Kay <i>et al.</i> 's (134) cladistic analyses with molecular scaffolds. The oldest stem platyrrhine is <i>Branisella</i> (134) from the late Oligocene of Bolivia (Salla Beds, Chron 8, age = 25.82-27.02 Ma) (127). Some authors have suggested that <i>Catopithecus browni</i> from the Priabonian is a stem catarrhine, but other authors ( <i>e.g.</i> , Williams <i>et al.</i> ; 131) have suggested a stem anthropoid position for this taxon. Seiffert <i>et al.</i> (130) recovered a polytomy with catarrhines, platyrrhines, Parapithecoidea, Proteopithecidae, and <i>Algeripithecus minutus</i> . The age of the latter taxon is Ypresian to basal Lutetian, which established a maximum of 56.0 Ma for the base of Anthropoidea if we allow for phylogenetic uncertainty, <i>i.e.</i> , that <i>Algeripithecus</i> is either a crown anthropoid or one of the first two outgroups. In contrast, Tabuce <i>et al.</i> (135) place <i>Algeripithecus</i> as a stem strepsirrhine based on more complete material. |
| 24. Catarrhini                    | 20.55  | 38.0 | PB/PU | <i>Afropithecus</i>                                                                                    | <i>Afropithecus turkanensis</i> , previously <i>Morotopithecus bishop</i> (136), is dated at 20.6 +/- 0.05 = 20.55 Ma based on overlying lava (137) and is the oldest crown-group catarrhine. It is a stem hominoid (138) or even a crown hominoid (137). The oldest cercopithecoid is <i>Victoriapithecus</i> (139) at ~19 Ma. Oligopithecids (including <i>Catopithecus</i> ) are sometimes regarded as stem catarrhines ( <i>e.g.</i> , see review of alternate hypotheses in Seiffert and Simons; 140) where <i>Catopithecus</i> is sometimes part of second outgroup to crown catarrhines). The age of <i>Catopithecus</i> is 34.8-33.7 Ma (Chron C13r) based on Seiffert (141), which is mostly within the Priabonian. We used the base of the Priabonian (38.0 Ma) as the maximum age for the base of Catarrhini.                                                                                                                                                                                                                                                                               |
| 25. Hominoidea                    | 11.608 | 28.1 | SB    | <i>Sivapithecus</i>                                                                                    | <i>Sivapithecus</i> is the oldest crown hominoid in Finarelli and Clyde's (138) cladistic and stratocladistic analyses.                                                                                                                                                                                                                                                                                                                                                                                                                                                                                                                                                                                                                                                                                                                                                                                                                                                                                                                                                                                |
| 26. Strepsirrhini                 | 38.0   | 56   | SB/PB | <i>Saharagalago</i>                                                                                    | <i>Saharagalago misrensis</i> is known from the Bartonian (142) and is assigned to Galagidae; <i>Karanisia</i> is as a crown lorissid in Seiffert <i>et al.</i> 's (142) analysis, although these authors also allow for the possibility that this taxon is a stem lorissid or stem lorissiform. These are the oldest crown strepsirrhines. Adapiforms are paraphyletic at the base of crown Strepsirrhini (see 143). The oldest adapiforms are early Eocene and establish a maximum age for Strepsirrhini.                                                                                                                                                                                                                                                                                                                                                                                                                                                                                                                                                                                            |
| 27. Chinchillidae to Octodontidae | 24.5   | 38.0 | SB/PB | <i>Sallamys</i> , <i>Xylechimys</i> , <i>Deseadomys</i>                                                | Molecular studies (144, 145) suggest that <i>Myocastor</i> , and possibly <i>Capromys</i> , are nested within Echimyidae. The fossil taxa <i>Sallamys</i> , <i>Xylechimys</i> , and <i>Deseadomys</i> (family Echimyidae) are all known from the Deseadean (146), which is mostly late Oligocene and has a minimum age of 24.5 Ma (147, 148). These fossils establish the minimum age for Echimyidae (inclusive of <i>Capromys</i> and <i>Myocastor</i> ). <i>Eosallamys</i> , <i>Eoespina</i> , <i>Eosachacui</i> , and <i>Eodelphomys</i> were assigned to Echimyidae and are known from the Santa Rosa Local Fauna of Peru (149, 150). The putative age of this fauna is late Eocene, but this age is based on stage of evolution arguments and remains to be firmly established using more rigorous stratigraphic methods. Hence, we incorporate this information into our maximum age but not our minimum age.                                                                                                                                                                                    |
| 28. Phiomorpha + Caviomorpha      | 40.94  | 56   | SB/PB | Stem caviomorphs in Antoine <i>et al.</i> (149) including <i>Cachiyacuy</i> and other stem Caviomorpha | This calibration was suggested by Phillips (97) based on fossils that were described by Antoine <i>et al.</i> (151) including <i>Cachiyacuy contamanensis</i> . We retained minimum and maximum ages suggested by Phillips (97). Hartenberger (152) contends that specimens of the early Eocene <i>Glibia</i> are instead the oldest representatives of                                                                                                                                                                                                                                                                                                                                                                                                                                                                                                                                                                                                                                                                                                                                                |

|                                        |       |       |       |                                       |                                                                                                                                                                                                                                                                                                                                                                                                                                                                                                                                                                                                                                                                                                                                                                                                                                                                                                                                                                                                                                  |
|----------------------------------------|-------|-------|-------|---------------------------------------|----------------------------------------------------------------------------------------------------------------------------------------------------------------------------------------------------------------------------------------------------------------------------------------------------------------------------------------------------------------------------------------------------------------------------------------------------------------------------------------------------------------------------------------------------------------------------------------------------------------------------------------------------------------------------------------------------------------------------------------------------------------------------------------------------------------------------------------------------------------------------------------------------------------------------------------------------------------------------------------------------------------------------------|
|                                        |       |       |       |                                       | Phiomoridae. Given this possibility we used the base of the early Eocene as the maximum age for Phiomorpha to Caviomorpha.                                                                                                                                                                                                                                                                                                                                                                                                                                                                                                                                                                                                                                                                                                                                                                                                                                                                                                       |
| 29. Myomorpha (=Muroidea to Dipodidae) | 45    | 59.2  | SB    | <i>Pappocricetodon</i>                | Eocene deposits in China with <i>Pappocricetodon</i> have been biocorrelated with Bridgerian and early Uintan LMAs of North America (133), and suggest an age of ~45 Ma. SB yields a maximum age of 59.2 Ma for Muroidea + Dipodidae.                                                                                                                                                                                                                                                                                                                                                                                                                                                                                                                                                                                                                                                                                                                                                                                            |
| 30. <i>Mus</i> to <i>Rattus</i>        | 10.4  | 15.97 |       | <i>Karmimata</i>                      | <i>Karmimata darwini</i> is known from the Dhok Pathan Formation, which has an absolute age in the vicinity of 10.4 Ma (81) within the Tortonian stage. <i>K. darwini</i> is closer to <i>Rattus</i> than <i>Mus</i> (81). We used 10.4 Ma as the minimum age for <i>Rattus</i> to <i>Mus</i> following Benton <i>et al.</i> (81). Benton <i>et al.</i> (81) suggested a maximum constraint of 14.0 Ma based on the oldest record of <i>Antemurus</i> , which is found in the Langhian stage. We used the base of the Langhian stage (15.97 Ma) rather than 14.0 Ma for the maximum age of <i>Mus</i> to <i>Rattus</i> .                                                                                                                                                                                                                                                                                                                                                                                                         |
| 31. Rodentia                           | 56.0  | 66.0  | SB    | <i>Acritoparamys</i> , <i>Paramys</i> | The earliest crown rodents ( <i>e.g.</i> , <i>Acritoparamys</i> , <i>Paramys</i> ) are late Thanetian in age (81) and establish a minimum age of 56.0 Ma for Rodentia. Given this age, stratigraphic bounding supports a maximum age of 66.0 Ma, which agrees with Benton <i>et al.</i> (81).                                                                                                                                                                                                                                                                                                                                                                                                                                                                                                                                                                                                                                                                                                                                    |
| 32. Lagomorpha                         | 47.6  | 61.6  | SB/PB | Ypresian tarsals                      | Tarsals from the Vastan mine, India, belong to crown Lagomorpha in phylogenetic analyses (153; p. 1205). The age of the Vastan mine deposits is Ypresian (minimum = 47.6 Ma). The first and second outgroups to crown Lagomorpha are <i>Palaeolagus</i> and <i>Mimotona</i> (154, 155). The latter is from the late Paleocene, which includes the Selandian and Thanetian. <i>Dawsonolagus</i> (156) is another stem lagomorph, but has not been included in cladistic analyses.                                                                                                                                                                                                                                                                                                                                                                                                                                                                                                                                                 |
| 33. Mammalia                           | 160.7 | 227   | PB/PU | <i>Ambondro</i>                       | <i>Ambondro</i> , from the Bathonian, is a crown mammal in a variety of analyses ( <i>e.g.</i> , Lou <i>et al.</i> (157) and Woodburne <i>et al.</i> (158); reviewed in Benton <i>et al.</i> (81)), although its affinities with monotremes versus therians remain controversial. We followed Benton <i>et al.</i> (81) and used the top of the Bathonian, <i>i.e.</i> , 166.1 +/- 1.2 Ma = 164.9 Ma. Multituberculata are generally placed inside of crown Mammalia ( <i>e.g.</i> , Kielan-Jaworowska <i>et al.</i> ; 159). Haramiyids, in turn, may be related to multituberculates (159-161). The oldest haramiyid is <i>Thomasia</i> from the Norian (162). The oldest mammal fossils are <i>Adelobasileus</i> (162), <i>Gondwanadon</i> (163), and <i>Tikitherium</i> (163) from the Carnian, but there is no suggestion that any of these taxa belong to crown Mammalia. Given the uncertainty associated with the placement of Haramiyidae, including <i>Thomasia</i> , we employed a maximum of 227 Ma (base of Norian). |
| 34. Neognathae                         | 66    | 86.8  | SB    | <i>Vegavis iaai</i>                   | Clarke <i>et al.</i> (164); Benton <i>et al.</i> (81, 121)                                                                                                                                                                                                                                                                                                                                                                                                                                                                                                                                                                                                                                                                                                                                                                                                                                                                                                                                                                       |
| 35. Amniota                            | 318   | 332.9 | SB    | <i>Hylonomus lyelli</i>               | <i>Hylonomus</i> is from the Joggins Formation of Nova Scotia. The most recent estimates for the age of the Joggins Formation are in the range of 318-319 Ma (81) (based on Gradstein <i>et al.</i> ; 165). The maximum age is based on the absence of crown amniotes in well-sampled, fossiliferous deposits that occur below the strata with <i>Hylonomus</i> (81).                                                                                                                                                                                                                                                                                                                                                                                                                                                                                                                                                                                                                                                            |
| 36. Archosauria to Lepidosauria        | 255.9 | 295.9 | SB    | <i>Protorosaurus speneri</i>          | <i>Protorosaurus speneri</i> is the oldest archosauromorph and has a minimum age estimate of 255.9 Ma (81, 121), which falls within the Wuchiapingian stage of the Permian. Benton <i>et al.</i> (81) suggested a maximum age of 295.9 Ma.                                                                                                                                                                                                                                                                                                                                                                                                                                                                                                                                                                                                                                                                                                                                                                                       |
| 37. Tetrapoda                          | 337   | 351   | SB    | <i>Lethiscus stocki</i>               | <i>Lethiscus</i> is the oldest reptilomorph (stem amniote) and is from the Wardie Shales, which belong to the Lower Oil Shale Group. The age of the Wardie Shales is ~343.5-337 Ma (81) (based on Gradstein <i>et al.</i> ; 165). The maximum age for Tetrapoda is from Benton <i>et al.</i> (81).                                                                                                                                                                                                                                                                                                                                                                                                                                                                                                                                                                                                                                                                                                                               |

<sup>A</sup>Table modified and updated after Meredith *et al.* (49). Abbreviations: PB, phylogenetic bracketing; PU, phylogenetic uncertainty; SB, stratigraphic bounding; Ma, million years.

## Supplementary References

68. N. V. Mezentseva, J. S. Kumaratilake, S. A. Newman, The brown adipocyte differentiation pathway in birds: An evolutionary road not taken. *BMC Biology* **6**, 17 (2008).
69. S. F. Altschul, T. L. Madden, A.A. Schäffer, J. Zhang, Z. Zhang, W. Miller, D. J. Lipman, Gapped BLAST and PSI-BLAST: A new generation of protein database search programs. *Nucleic Acids Res.* **25**, 3389–3402 (1997).
70. M. Burset, I. A. Seledtsov, V. V. Solovyev, Analysis of canonical and non-canonical splice sites in mammalian genomes. *Nucleic Acids Res.* **28**, 4364-4375 (2000).
71. M. J. Sullivan, N. K. Petty, S. A. Beatson, Easyfig: A genome comparison visualiser. *Bioinformatics* **27**, 1009-1010 (2011).
72. J. C. Opazo, A.M. Sloan, K.L. Campbell, J.F. Storz, Origin and ascendancy of a chimeric fusion gene: The  $\beta/\delta$ -globin gene of paenungulate mammals. *Mol. Biol. Evol.* **26**, 1469-1478 (2009).
73. S. Mirceta, A. V. Signore, J. M. Burns, A. R. Cossins, K. L. Campbell, M. Berenbrink, Evolution of mammalian diving capacity traced by myoglobin net charge. *Science* **340**, 1234192 (2013).
74. M. S. Springer, C. A. Emerling, N. Fugate, R. Patel, J. Starrett, P. A. Morin, C. Hayashi, J. Gatesy, Inactivation of cone-specific phototransduction genes in rod monochromatic cetaceans. *Front. Ecol. Evol.* **4**, 61 (2016).
75. A. W. Briggs, U. Stenzel, P. L. Johnson, R. E. Green, J. Kelso, K. Prüfer, M. Meyer, J. Krause, M. T. Ronan, M. Lachmann, S. Pääbo, Patterns of damage in genomic DNA sequences from a Neandertal. *Proc. Natl. Acad. Sci. U.S.A.* **104**, 14616-14621 (2007).

76. R. Schmieder, R. Edwards, Quality control and preprocessing of metagenomic datasets. *Bioinformatics* **27**, 863-864 (2011).
77. J. Dabney, M. Knapp, I. Glocke, M. T. Gansauge, A. Weihmann, B. Nickel, C. Valdiosera, N. García, S. Pääbo, J. L. Arsuaga, M. Meyer, Complete mitochondrial genome sequence of a Middle Pleistocene cave bear reconstructed from ultrashort DNA fragments. *Proc. Natl. Acad. Sci. USA* **110**, 15758–15763 (2013).
78. R. C. Edgar, MUSCLE: Multiple sequence alignment with high accuracy and high throughput. *Nucleic Acids Res.* **32**, 1792-1797 (2004).
79. M. A. Miller, W. Pfeiffer, T. Schwartz, Creating the CIPRES Science Gateway for inference of large phylogenetic trees. *Gateway Computing Environments Workshop*, 1-8 (2010).
80. B. Rannala, Z. Yang, Inferring speciation times under an episodic molecular clock. *Syst. Biol.* **56**, 453-466 (2007).
81. M. J. Benton, P. C. Donoghue, R. J. Asher, M. Friedman, T. J. Near, J. Vinther, Constraints on the timescale of animal evolutionary history. *Palaeontologia Electronica* **18.1.1FC**, 1 (2015).
82. R. W. Meredith, M. A. Mendoza, K. K. Roberts, M. Westerman, M. S. Springer, A phylogeny and timescale for the evolution of Pseudocheiridae (Marsupialia: Diprotodontia) in Australia and New Guinea. *J. Mamm. Evol.* **17**, 75-99 (2010).
83. M. S. Springer, R. W. Meredith, J. E. Janecka, W. J. Murphy, The historical biogeography of Mammalia. *Phil. Trans. R. Soc. B* **366**, 2478 (2011).

84. I. Horovitz, T. Martin, J. Bloch, S. Ladevèze, C. Kurz, M. R. Sánchez-Villagra, Cranial anatomy of the earliest marsupials and the origin of opossums. *PLOS ONE* **4**, e8278 (2009).
85. L. P. Bergqvist, É. A. L. Abrantes, L. d. S. Avilla, The Xenarthra (Mammalia) of São José de Itaboraí Basin (upper Paleocene, Itaboraian), rio de Janeiro, Brazil. *Geodiversitas* **26**, 323-337 (2004).
86. M. J. Benton, P. C. J. Donoghue, Paleontological evidence to date the tree of life. *Mol. Biol. Evol.* **24**, 26-53 (2007).
87. M. O. Woodburne, F. J. Goin, M. Bond, A. A. Carlini, J. N. Gelfo, G. M. López, A. Iglesias, A. N. Zimicz, Paleogene land mammal faunas of South America; A response to global climatic changes and indigenous floral diversity. *J. Mamm. Evol.* **21**, 1-73 (2014).
88. P. Vignaud, P. Düringer, H. T. Mackaye, A. Likius, C. Blondel, J. R. Boisserie, L. de Bonis, V. Eisenmann, M.-E. Etienne, D. Geraads, F. Guy, T. Lehmann, F. Lihoreau, N. Lopez-Martinez, C. Mourer-Chauviré, O. Otero, J.-C. Rage, M. Schuster, L. Viriot, A. Zazzo, M. Brunet, Geology and palaeontology of the Upper Miocene Toros-Menalla hominid locality, Chad. *Nature* **418**, 152-155 (2002).
89. A.-E. Lebatard, D. L. Bourlès, P. Düringer, M. Jolivet, R. Braucher, J. Carcaillet, M. Schuster, N. Arnaud, P. Monié, F. Lihoreau, A. Likius, Cosmogenic nuclide dating of *Sahelanthropus tchadensis* and *Australopithecus bahrelghazali*: Mio-Pliocene hominids from Chad. *Proc. Natl. Acad. Sci. U.S.A.*, **105**, 3226-3231 (2008).
90. J. Shoshani, P. Tassy, Advances in proboscidean taxonomy & classification, anatomy & physiology, and ecology & behavior. *Quatern. Int.* **126-128**, 5-20 (2005).

91. P. Tassy, Elephantoidea from Lothagam, in *Lothagam: The Dawn of Humanity in Eastern Africa*. M. G. Leakey, J. M. Harris, Eds. (Columbia Univ. Press, New York, 2003), pp. 331-358.
92. J. Vélez-Juarbe, D. P. Domning, Fossil Sirenia of the West Atlantic and Caribbean region. XI. *Callistosiren boriquirensis*, gen. et sp. nov. *J. Vertebr. Paleontol.* **35**, e885034 (2015).
93. J. Vélez-Juarbe, D. P. Domning, N. D. Pyenson, Iterative evolution of sympatric seacow (Dugongidae, Sirenia) assemblages during the past ~26 million years. *PLOS ONE* **7**, e31294 (2012).
94. Vélez-Juarbe, J., Domning, D.P., Fossil Sirenia of the West Atlantic and Caribbean region. IX. *Metaxytherium albifontanum*, sp. nov. *J. Vertebr. Paleontol.* **34**, 444-464 (2014).
95. L. Kocsis, E. Gheerbrant, M. Mouflih, H. Cappetta, J. Yans, M. Amaghazaz, Comprehensive stable isotope investigation of marine biogenic apatite from the late Cretaceous-early Eocene phosphate series of Morocco. *Palaeogeogr. Palaeoclimatol. Palaeoecol.* **394**, 74-88 (2014).
96. P. Eiting, G. F. Gunnell, Global completeness of the bat fossil record. *J. Mammal. Evol.* **16**, 151-173 (2009).
97. M. Phillips, Four mammal fossil calibrations: Balancing competing palaeontological and molecular considerations. *Palaeontologia Electronica* **18.1.5FC**, 1 (2015).
98. N. J. Czaplewski, G. S. Morgan, S. A. McLeod, Chiroptera, in *Evolution of Tertiary Mammals of North America, Volume 2*, C. M. Janis, G. F. Gunnell, M. D. Uhen, Eds. (Cambridge Univ. Press, New York, 2008), pp. 174-197.
99. N. B. Simmons, K. L. Seymour, J. Habersetzer, G. F. Gunnell, Primitive early Eocene bat from Wyoming and the evolution of flight and location. *Nature* **451**, 818-821 (2008).

100. E. C. Teeling, M. S. Springer, O. Madsen, P. Bates, S. J. O'Brien, W.J. Murphy, A molecular phylogeny for bats illuminates biogeography and the fossil record. *Science* **307**, 580-584 (2005).
101. R. W. Meredith, M. Westerman, J. A. Case, M. S. Springer, A phylogeny and timescale for marsupial evolution based on sequences for five nuclear genes. *J. Mamm. Evol.* **15**, 1-36 (2009).
102. E. C. Teeling, M. Scally, D. J. Kao, M. L. Romagnoli, M.S. Springer, M.J. Stanhope, Molecular evidence regarding the origin of echolocation and flight in bats. *Nature* **403**, 188-192 (2000).
103. E. C. Teeling, O. Madsen, R. A. Van Den Bussche, W. W. de Jong, M. J. Stanhope, M. S. Springer, Microbat paraphyly and the convergent evolution of a key innovation in Old World rhinolophoid microbats. *Proc. Natl. Acad. Sci. U.S.A.* **99**, 1431-1436 (2002).
104. M. S. Springer, E. C. Teeling, O. Madsen, M. J. Stanhope, W. W. de Jong, Integrated fossil and molecular data reconstruct bat echolocation. *Proc. Natl. Acad. Sci. U.S.A.* **98**, 6241-6246 (2001).
105. G. F. Gunnell, N. B. Simmons, Fossil evidence and the origin of bats. *J. Mammal. Evol.* **12**, 209-246 (2005).
106. X.-M. Wang, R. H. Tedford, Canidae, in *The Terrestrial Eocene-Oligocene Transition in North America*, D. R. Prothero and R. J. Emry, Eds. (Cambridge Univ. Press, New York, 1996), pp. 433-452.
107. M. Spaulding, J. J Flynn, Anatomy of the postcranial skeleton of “*Miacis*” *uintensis* (Mammalia: Carnivoramorpha). *J. Vertebr. Paleontol.* **29**, 1212-1223 (2009).



108. J. A. Finarelli, A total evidence phylogeny of the Arctoidea (Carnivora: Mammalia): Relationships among basal taxa. *J. Mammal. Evol.* **15**, 231 (2008).
109. X. Wang, M. C. McKenna, D. Dashzeveg, *Amphicticeps* and *Amphicynodon* (Arctoidea, Carnivora) from Hsanda Gol Formation, Central Mongolia and phylogeny of basal arctoids with comments on zoogeography. *Am. Mus. Novit.* **3483**, 1-60 (2005).
110. W. Banyue, Q. Zhanxiang, Notes on early Oligocene ursids (Carnivora, Mammalia) from Saint Jacques, Nei Mongol, China. *Bull. Am. Mus. Nat. Hist.* **279**, 116 (2003).
111. J. A. Baskin, Mustelidae, in *Evolution of Tertiary Mammals of North America, Volume 1*, C. M. Janis, K. M. Scott, L. L. Jacobs, Eds. (Cambridge Univ. Press, New York, 1998), pp. 152-173.
112. J. J. Sato, M. Wolsan, S. Minami, T. Hosoda, M. H. Sinaga, K. Hiyama, Y. Yamaguchi, H. Suzuki, Deciphering and dating red panda's ancestry and early adaptive radiation. *Mol. Phylogenet. Evol.* **53**, 907-922 (2009).
113. S. Tomiya, A new basal caniform (Mammalia: Carnivora) from the middle Eocene of North America and remarks on the phylogeny of early carnivorans. *PLOS ONE* **6**, e24146 (2011).
114. M. D. Uhen, R. E. Fordyce, L. G. Barnes, Odontoceti, in *Evolution of Tertiary Mammals of North America, Volume 2*, C. M. Janis, G. F. Gunnell, M. D. Uhen, Eds. (Cambridge Univ. Press, New York, 2008), pp. 566-606.
115. T. A. Deméré, A. Berta, P. J. Adam, Pinnipedimorph evolutionary biogeography. *Bull. Am. Mus. Nat. Hist.* **279**, 32-76 (2003).

116. G. D. Wesley-Hunt, J. J. Flynn, Phylogeny of the Carnivora: Basal relationships among the carnivoramorphan, and assessment of the position of 'Miacoidea' relative to Carnivora. *J. Syst. Palaeontol.* **31**, 1-28 (2005).
117. R. M. Hunt, R. H. Tedford, Phylogenetic relationships within the aeluroid Carnivora and implications of their temporal and geographic distribution, in *Mammal Phylogeny: Placentals*, F. S. Szalay, M. J. Novacek, M. C. McKenna, Eds. (Springer-Verlag, New York, 1993), pp. 53-73.
118. J. J. Flynn, Carnivoran phylogeny and rates of evolution: Morphological, taxic, and molecular, in *Carnivore Behavior, Ecology, and Evolution, Volume 2*, J. L. Gittleman, Ed. (Cornell Univ. Press, New York, 1996), pp. 542-581.
119. E. Barycka, Evolution and systematics of the feliform Carnivora. *Mamm. Biol.* **72**, 257-282 (2007).
120. M. O. Woodburne, G. F. Gunnell, R. K. Stucky, Climate directly influences Eocene mammal faunal dynamics in North America. *Proc. Natl. Acad. Sci. U.S.A.* **106**, 13399-13403 (2009).
121. M. J. Benton, P. C. J. Donoghue, R. J. Asher, Calibrating and constraining molecular clocks, in *The Timetree of Life*, S. B. Hedges, S. Kumar, Eds. (Oxford Univ. Press, New York, 2009), pp. 35-86.
122. M. A. O'Leary, J. Gatesy, Impact of increased character sampling on the phylogeny of Cetartiodactyla (Mammalia): Combined analysis including fossils. *Cladistics* **24**, 397-442 (2008)
123. E. D. Mitchell, A new cetacean from the late Eocene La Meseta Formation, Seymour Island, Antarctic Peninsula. *Can. J. Fish. Aquat. Sci.* **46**, 2219-2235 (1989).

124. E. M. G. Fitzgerald, Pliocene marine mammals from the Whalers Bluff Formation of Portland, Victoria, Australia. *Mem. Mus. Vic.* **62**, 67-89 (2005).
125. R. E. Fordyce, Oligocene origin of skim-feeding right whales: A small archaic balaenid from New Zealand. *J. Vertebr. Paleontol.* **22**, 54A (2002).
126. S. Bajpai, R. F. Kay, B. A. Williams, D. P. Das, V. V. Kapur, B.N. Tiwari, The oldest Asian record of Anthropoidea. *Proc. Natl. Acad. Sci. U.S.A.* **105**, 11093-11098 (2008).
127. K. D. Rose, R. S. Rana, A. Sahni, K. Kumar, P. Missiaen, L. Singh, T. Smith, Early Eocene Primates from Gujarat, India. *J. Human Evol.* **56**, 366–404 (2009).
128. J. I. Bloch, M. T. Silcox, D. M. Boyer, E. J. Sargis, New Paleocene skeletons and the relationship of plesiadapiforms to crown-clade primates. *Proc. Natl. Acad. Sci. U.S.A.* **104**, 1159-1164 (2007).
129. G. V. R. Prasad, Divergence time estimates of mammals from molecular clocks and fossils: Relevance of new fossil finds from India. *J. Biosci.* **34**, 649-659 (2009).
130. E. R. Seiffert, E. L. Simons, W. C. Clyde, J. B. Rossie, Y. Attia, T. M. Bown, P. Chatrath, M. E. Mathison, Basal anthropoids from Egypt and the antiquity of Africa's higher primate radiation. *Science* **310**, 300-304 (2005).
131. B. A. Williams, R. F. Kay, E. C. Kirk, New perspectives on anthropoid origins. *Proc. Natl. Acad. Sci. U.S.A.* **107**, 4797-4808 (2010).
132. K. C. Beard, T. Qi, M. R. Dawson, B. Wang, C. Li, A diverse new primate fauna from middle Eocene fissure-fillings in southeastern China. *Nature* **368**, 604-609 (1994).
133. J. B. Rossie, X. Ni, K. C. Beard, Cranial remains of an Eocene tarsier. *Proc. Natl. Acad. Sci. U.S.A.* **103**, 4381-4385 (2006).

134. R. F. Kay, J. G. Fleagle, T. R. T. Mitchell, M. Colbert, T. Bown, D. W. Powers, The anatomy of *Dolichocebus gaimanensis*, a stem platyrrhine monkey from Argentina. *J. Human Evol.* **54**, 323-382 (2008).
135. R. Tabuce, L. Marivaux, R. Lebrun, M. Adaci, M. Bensalah, P. H. Fabre, E. Fara, H. G. Rodrigues, L. Hautier, J.-J. Jaeger, V. Lazzari, F. Mebrouk, S. Peigné, J. Sudre, P. Tafforeau, X. Valentin, M. Mahboubi, Anthropoid versus strepsirrhine status of the African Eocene primates *Algeripithecus* and *Azibius*: Craniodental evidence. *Proc. R. Soc. B* **276**, 4087 (2009).
136. T. Harrison, P. Andrews, The anatomy and systematic position of the early Miocene proconsulid from Meswa Bridge, Kenya. *J. Human Evol.* **56**, 479-496 (2009).
137. N. M. Young, L. MacLachy, The phylogenetic position of *Morotopithecus*. *J. Hum. Evol.* **46**, 163-184 (2004).
138. J. A. Finarelli, W. C. Clyde, Reassessing hominoid phylogeny: Evaluating congruence in the morphological and temporal data. *Paleobiology* **30**, 614 (2004).
139. M. I. Jensen-Seaman, K. A. Hooper-Boyd, Molecular clocks: Determining the age of the human-chimpanzee divergence, in *Encyclopedia of Life Sciences (ELS)* (Wiley, Chichester, 2008). pp. 1-6.
140. E. R. Seiffert, E. L. Simons, Astragalar morphology of late Eocene anthropoids from the Fayum Depression (Egypt) and the origin of catarrhine primates. *J. Human Evol.* **41**, 577-606 (2001).
141. E. R. Seiffert, Revised age estimates for the later Paleogene mammal faunas of Egypt and Oman. *Proc. Natl. Acad. Sci. U.S.A.* **103**, 5000-5005 (2006).

142. E. R. Seiffert, E. L. Simons, Y. Attia, Fossil evidence for an ancient divergence of lorises and galagos. *Nature* **422**, 421-424 (2003).
143. E. R. Seiffert, J. M. G. Perry, E. L. Simons, D. M. Boyer, Convergent evolution of anthropoid-like adaptations in Eocene adapiform primates. *Nature* **461**, 1118-1121 (2009).
144. T. Galewski, J.-F. Mauffrey, Y. L. R. Leite, J. L. Patton, E. J. P., Douzery, Ecomorphological diversification among South American rats (Rodentia; Echimyidae): a phylogenetic and chronological approach. *Mol. Phylogenet. Evol.* **34**, 601-615 (2005).
145. B. D. Patterson, P. M. Velazco, Phylogeny of the rodent genus *Isothrix* (Hystricognathi, Echimyidae) and its diversification in Amazonia and the Eastern Andes. *J. Mammal. Evol.* **15**, 181-201 (2008).
146. M. G. Vucetich, D. H. Verzi, J.-l. Hartenberger, Review and analysis of the radiation of the South American Hystricognathi (Mammalia, Rodentia). *C. R. Acad. Sci. Paris Earth Planet. Sci.* **329**, 763-769 (1999).
147. J. J. Flynn, C. C. Swisher III, Cenozoic South American Land Mammal Ages: Correlation to global geochronologies, in *Geochronology, Time-Scales, and Global Stratigraphic Correlation, SEPM*, W. A. Berggren, D. V. Kent, J. Hardenbol, Eds. (Soc. for Sedimentary Geology, Tulsa, Oklahoma, Special Publication 54, 1995), pp. 317-333.
148. J. J. Flynn, A. R. Wyss, Recent advances in South American mammalian paleontology. *Trends Ecol. Evol.* **13**, 449-454 (1998).
149. K. E. Campbell, Jr., C. D. Frailey, L. Romero-Pittman, The Paleogene Santa Rosa Local Fauna of Amazonian Peru: Geographic and geologic setting. *Nat. Hist. Mus. Los Angeles County, Sci. Ser.* **40**, 3-14 (2004).

150. C. D. Frailey, K. E. Campbell, Jr., Paleogene rodents from Amazonian Peru: The Santa Rosa Local Fauna. *Nat. Hist. Mus. Los Angeles County, Sci. Ser.* **40**, 71 (2004).
151. P.-O. Antoine, L. Marivaux, D. A. Croft, G. Billet, M. Ganerød, C. Jaramillo, T. Martin, M. J. Orliac, J. Tejada, A. J. Altamirano, F. Duranthon, G. Fanjat, S. Rouse, R. Salas Gismondi, Middle Eocene rodents from Peruvian Amazonia reveal the pattern and timing of caviomorph origins and biogeography. *Proc. Roy. Soc. B* **279**, 1319-1326 (2011).
152. J.-L. Hartenberger, Description de la radiation des Rodentia (Mammalia) du Paléocène supérieur au Miocène; incidences phylogénétiques. *C. R. Acad. Sci. Paris Earth Planet. Sci.* **326**, 439-444 (1998).
153. K. D. Rose, V. B. DeLeon, P. Missiaen, R. S. Rana, A. Sahni, L. Singh, T. Smith, Early Eocene lagomorph (Mammalia) from Western India and the early diversification of Lagomorpha. *Proc. R. Soc. B.* **275**, 1203-1208 (2008).
154. J. Meng, Phylogeny and divergence of basal Glires. *Bull. Am. Mus. Nat. Hist.* **285**, 93-109 (2004).
155. R. J. Asher, J. Meng, J. R. Wible, M. C. McKenna, G. W. Rougier, D. Dashzeveg, M. J. Novacek, Stem Lagomorpha and the antiquity of Glires. *Science* **307**, 1091-1094 (2005).
156. C. Li, J. Meng, Y. Wang, *Dawsonolagus antiquus*, a primitive lagomorph from the Eocene Arshanto Formation, Nei Mongol, China. *Bull. Carnegie Mus. Nat. Hist.* **39**, 97-110 (2007).
157. Z.-X. Luo, R. L. Cifelli, Z. Kielan-Jaworowska, Dual origin of tribosphenic mammals. *Nature* **409**, 53-57 (2001).
158. M. O. Woodburne, T. H. Rich, M. S. Springer, The evolution of tribospheny and the antiquity of mammalian clades. *Mol. Phylogenet. Evol.* **28**, 360-385 (2003).

159. Z. Kielan-Jaworowska, R. L. Cifelli, Z.-X. Luo. *Mammals from the Age of Dinosaurs: Origins, Evolution, and Structure* (Columbia Univ. Press, New York, 2004). p. 630.
160. S. Bi, Y. Wang, J. Guan, X. Sheng, J. Meng, Three new Jurassic euharamiyidan species reinforce early divergence of mammals. *Nature* **514**, 579-584 (2015).
161. D. W. Krause, S. Hoffmann, J. R. Wible, E. C. Kirk, J. A. Schultz, W. von Koenigswald, J. R. Groenke, J.B. Rossie, P. M. O'Connor, E. R. Seiffert, E. R. Dumont, W. L. Holloway, R. R. Rogers, L. J. Rahantarisoa, A. D. Kemp, H. Andriamialison, First cranial remains of a gondwanatherian mammal reveal remarkable mosaicism. *Nature* **515**, 512-517 (2014).
162. S. G. Lucas, Z. Luo, *Adelobasileus* from the Upper Triassic of West Texas: The oldest mammal. *J. Vertebr. Paleontol.* **13**, 309-334 (1993).
163. P. M. Datta, Earliest mammal with transversely expanded upper molar from the Late Triassic (Carnian) Tiki Formation, South Rewa Gondwana Basin, India. *J. Vertebr. Paleontol.* **25**, 200-207 (2005).
164. J. A. Clarke, C. P. Tambussi, J. I. Noriega, G. M. Erickson, R. A. Ketcham, Definitive fossil evidence for the extant avian radiation in the Cretaceous. *Nature* **433**, 305-308 (2005).
165. F. M. Gradstein, J. G. Ogg, M. Schmitz, G. Ogg, *The Geologic Time Scale* (Elsevier, Amsterdam, 2012). p. 1176.
166. K. M. Cohen, S. C., Finney, P. L., Gibbard, J. -X. Fan, The ICS International Chronostratigraphic Chart. *Episodes* **36**, 199-204 (2013).
167. T. J. Near, R. I. Eytan, A. Dornburg, K. L. Kuhn, J. A. Moore, M. P. Davis, P. C. Wainwright, M. Friedman, W. L. Smith, Resolution of ray-finned fish phylogeny and timing of diversification. *Proc. Natl. Acad. Sci. U.S.A.* **109**, 13698-13703 (2012).

168. F. A. Smith, A. G. Boyer, J. H. Brown, D. P. Costa, T. Dayan, S. M. Ernest, A. R. Evans, M. Fortelius, J. L. Gittleman, M. J. Hamilton, L. E. Harding, The evolution of maximum body size of terrestrial mammals. *Science* **330**, 1216–1219 (2010). [MAMMOTH v1.5 December 2015]
169. P. D. Gingerich, M. ul Haq, I. S. Zalmout, I. H. Khan, M. S. Malkani, Origin of whales from early artiodactyls: Hands and feet of Eocene Protocetidae from Pakistan. *Science* **293**, 2239-2242 (2001a).
170. P. D. Gingerich, Body weight and relative brain size (encephalization) in Eocene Archaeoceti (Cetacea). *J. Mamm. Evol.* **23**, 7-31 (2016).
171. P. D. Gingerich, M. U. N. I. R. Ul-Haq, I. H. Khan, I. S. Zalmout, Eocene stratigraphy and archaeocete whales (Mammalia, Cetacea) of Drug Lahar in the eastern Sulaiman Range, Balochistan (Pakistan). *Contr. Mus. Paleont. Univ. Michigan* **30**, 269–319 (2001b).
172. P. D. Gingerich, W. von Koenigswald, W. J. Sanders, B. H. Smith, I. S. Zalmout, New protocetid whale from the middle Eocene of Pakistan: birth on land, precocial development, and sexual dimorphism. *PLOS ONE* **4**, e4366 (2009).
173. S. H. Montgomery, J. H. Geisler, M. R. McGowen, C. Fox, L. Marino, J. Gatesy, The evolutionary history of cetacean brain and body size. *Evolution* **67**, 3339-3353 (2013).
174. E. Gheerbrant, M. Amaghazaz, B. Bouya, F. Goussard, C. Letenneur, *Ocepeia* (Middle Paleocene of Morocco): The oldest skull of an afrotherian mammal. *PLOS ONE* **9**, e89739 (2014).
175. M. N. Puttick, G. H. Thomas, Fossils and living taxa agree on patterns of body mass evolution: A case study with Afrotheria. *Proc. R. Soc. B* **282**, 20152023 (2015).



176. A. Larramendi, Shoulder height, body mass, and shape of proboscideans. *Acta Palaeontol. Pol.* **61**, 537-574 (2016).
177. E. Gheerbrant, A. Filippo, A. Schmitt, Convergence of afrotherian and laurasiatherian ungulate-like mammals: First morphological evidence from the Paleocene of Morocco. *PLOS ONE* **11**, e0157556 (2016).
178. E. R. Seiffert, S. Nasir, A. Al-Harthy, J. R. Groenke, B. P. Kraatz, N. J. Stevens, A. R. Al-Sayigh, Diversity in the later Paleogene proboscidean radiation: A small barytheriid from the Oligocene of Dhofar Governorate, Sultanate of Oman. *Naturwissenschaften* **99**, 133-141 (2012).
179. C. Delmer, Reassessment of the generic attribution of *Numidotherium savagei* and the homologies of lower incisors in proboscideans. *Acta Palaeont. Pol.* **54**, 561-580 (2009).
180. C. Delmer, M. Mahboubi, R. Tabuce, P. Tassy, A new species of *Moeritherium* (Proboscidea, Mammalia) from the Eocene of Algeria: New perspectives on the ancestral morphotype of the genus. *Palaeontology* **49**, 421-434 (2006).
181. D. A. Hooijer, H. Boschma, Fossil Proboscidea from the Malay archipelago and the Punjab. EJ Brill (1955).
182. R. Tabuce, E. R. Seiffert, E. Gheerbrant, L. Alloing-Séguier, W. von Koenigswald, Tooth enamel microstructure of living and extinct hyracoids reveals unique enamel types among mammals. *J. Mamm. Evol.* (2016).
183. G. T. Schwartz, D. T. Rasmussen, R. J. Smith, Body-size diversity and community structure of fossil hyracoids. *J. Mammal.* **76**, 1088-1099 (1995).
184. L. Shoemaker, A. Clauset, A. Body mass evolution and diversification within horses (family Equidae). *Ecol. Lett.* **17**, 211-220 (2014).

185. J. Alroy, A. K. Behrensmeyer, A. Turner, M. D. Uhen, Taxonomic occurrences of Equidae recorded in Fossilworks, the Evolution of Terrestrial Ecosystems database, and the Paleobiology Database (2016). <http://fossilworks.org>
186. J. Alroy, A. K. Behrensmeyer, M. D. Uhen, A. Turner, Taxonomic occurrences of Proboscidea recorded in Fossilworks, the Evolution of Terrestrial Ecosystems database, and the Paleobiology Database (2016). <http://fossilworks.org>.
187. J. Alroy, A. K. Behrensmeyer, M. D. Uhen, A. Turner, Taxonomic occurrences of Hyracoidea recorded in Fossilworks, the Evolution of Terrestrial Ecosystems database, and the Paleobiology Database (2016). <http://fossilworks.org>.
188. M. Pickford, New Neogene hyracoid specimens from the Peri-Tethys region and East Africa. *Paleontol. Res.* **13**, 265-278 (2009).
189. M. Pickford, Revision of the Early Miocene Hyracoidea (Mammalia) of East Africa. *Comptes Rendus Palevol* **3**, 675-690 (2004).
190. M. D. Uhen, Taxonomic occurrences of Sirenia recorded in Fossilworks, the Evolution of Terrestrial Ecosystems database, and the Paleobiology Database (2016). <http://fossilworks.org>.
191. J. Balaguer, D. M. Alba, A new dugong species (Sirenia, Dugongidae) from the Eocene of Catalonia (NE Iberian Peninsula). *Comptes Rendus Palevol* **15**, 489-500 (2016).
192. M. D. Uhen, Taxonomic occurrences of Cetacea recorded in Fossilworks, the Evolution of Terrestrial Ecosystems database, and the Paleobiology Database (2016). <http://fossilworks.org>.
193. V. Eisenmann, J. Howe, M. Pichardo, Old world hemiones and new world slender species (Mammalia, Equidae). *Palaeovertebrata* **36**, 159-233 (2008).

194. B. J. MacFadden, Patterns of phylogeny and rates of evolution in fossil horses: Hipparions from the Miocene and Pliocene of North America. *Paleobiology* **11**, 245-257 (1985).
195. H. F. Osborn, Equidae of the Oligocene, Miocene, and Pliocene of North America: Iconographic type revision. *Memoirs of the American Museum of Natural History* **2**, 1-217 (1918).
196. H. F. Osborn, W. D. Matthew, Cenozoic mammal horizons of western North America, No. 361 (US Government Printing Office, 1909). p. 138.
197. C. M. Janis, K. M. Scott, L. L. Jacobs, *Evolution of Tertiary mammals of North America: Volume 1, terrestrial carnivores, ungulates, and ungulate like mammals* (Cambridge Univ. Press, 1998). p. 691.
198. D. E. Wilson, D. M. Reeder, eds., *Mammal species of the world: a taxonomic and geographic reference* (Johns Hopkins Univ. Press, 2005). p. 2142.
